1 **Human saphenous vein provides a unique source of anti-calcific pericytes for prosthetic**  
2 **cardiac valve engineering**

3

4 **Short title: Valve engineering using adventitial pericytes**

5

6 Eva Jover, PhD\* <sup>1,2</sup>; Marco Fagnano, MSc <sup>1</sup>; William Cathery, Meng <sup>1</sup>; Sadie Slater, PhD <sup>1</sup>; Emanuela  
7 Pisanu, BSc <sup>1</sup>; Yue Gu, BSc <sup>1</sup>; Elisa Avolio, PhD <sup>1</sup>; Domenico Bruno, MD <sup>1</sup>;  
8 Daniel Baz-Lopez, MSc <sup>1</sup>; Ashton Faulkner, PhD <sup>1</sup>; Michele Carrabba, PhD <sup>1</sup>;  
9 Gianni Angelini, MD, MCh, FRCS <sup>1</sup>; Paolo Madeddu, MD\* <sup>1</sup>

10

11 1, Bristol Medical School (Translational Health Sciences), Bristol Heart Institute, University of  
12 Bristol, Bristol, United Kingdom

13 2, Navarrabiomed, Complejo Hospitalario de Navarra (CHN), Universidad Pública de Navarra  
14 (UPNA), IdiSNA. Pamplona. Spain

15

16 **Keywords:** Valvular heart disease, prosthetic valve, calcification, tissue engineering, pericytes,  
17 mesenchymal stromal cells, microRNAs.

18

19 **Corresponding Authors\*:**

20 Dr Eva Jover, Postdoctoral Fellow

21 Cardiovascular Translational Research

22 Navarrabiomed (Miguel Servet Foundation)

23 C/Irunlarrea 3

24 31008 Pamplona, Spain.

25 Email: [ej14025@bristol.ac.uk](mailto:ej14025@bristol.ac.uk); [eva.jover.garcia@navarra.es](mailto:eva.jover.garcia@navarra.es)

26 Tel: +34 848428539

27

28 Prof. Paolo Madeddu, Professor of Experimental Cardiovascular Medicine

29 Bristol Medical School, Translational Health Sciences, University of Bristol

30 Upper Maudlin Street.

31 BS28HW, Bristol, United Kingdom

32 Email: [mdprm@bristol.ac.uk](mailto:mdprm@bristol.ac.uk)

33 Tel and fax: +44 (0)1173423904

34

35

36

37

38 **Abstract**

39 **Aims:** Tissue engineering seeks to improve the longevity of prosthetic heart valves, but the cell source  
40 of choice has yet to be determined. This study aimed to establish a mechanistic rationale supporting  
41 the suitability of human adventitial pericytes (APCs).

42 **Methods and Results: Antigenically** APCs were immunomagnetically sorted from saphenous vein  
43 leftovers of patients undergoing coronary artery surgery and antigenically characterized for purity.  
44 Unlike bone marrow-derived mesenchymal stromal cells (BM-MSCs), APCs were resistant to  
45 osteochondrogenic induction by high phosphate (HP), as assessed by cytochemistry and expression of  
46 osteogenic markers. MiR-132 is natively expressed by APCs, with copy numbers being enhanced by  
47 HP stimulation. *In silico* bioinformatic analysis, followed by luciferase assays in HEK293 cells and  
48 miR-132 titration using agomiR and antagomiR in APCs, demonstrated that several  
49 osteochondrogenic genes were negatively regulated by miR-132. Among these, the glycolytic marker  
50 GLUT1 was downregulated in HP-stimulated APCs. In contrast to BM-APCs, APCs showed no  
51 increase in glycolysis under HP. Interestingly, incubation with APC-derived conditioned medium  
52 conferred swine cardiac valves with resistance to osteogenic transformation by HP; whereas,  
53 conditioned media from miR-132-knocked-down APCs failed to prevent the expression of these  
54 markers. Finally, we demonstrated the feasibility of using APCs to engineer bovine pericardium  
55 patches. APCs proliferate in the patch and secrete factors able to attract aortic endothelial cells under  
56 HP.

57 **Conclusions:** Human APCs are resistant to calcification compared with BM-MSCs and convey the  
58 anti-calcific phenotype to heart valves through miR-132. These findings may open new important  
59 avenues for prosthetic valve cellularization.

60

61

62

63 **Abstract**, 246 words

64 **Text**, 4728 words

65 **Legends**, 1248 words

66 **Figures**, 7

67 **Table** 3

68

69

70

71

72

73

74

75 **Introduction**

76 Calcific valvular heart disease (VHD) represents the third most common cardiovascular pathology in  
77 adults after hypertension and coronary artery disease.<sup>1,2</sup> Aortic valve disease alone affects ~2% of the  
78 population over 65 years, and is a major cause of morbidity and mortality in the elderly.<sup>3,4</sup> Surgical  
79 valve replacement remains one of the main therapeutic solutions to treat VHD and accounts for more  
80 than 20% of all cardiac surgeries.<sup>5</sup>

81 Over the past decades, the clinical outcome of patients undergoing valve substitution has been  
82 significantly improved thanks to more frequent use of biological prostheses and better control of risk  
83 factors and complications. Biological prostheses, however, undergo calcific degeneration, ultimately  
84 requiring reinterventions after 10-15 years from implantation.<sup>6,7</sup>

85 Tissue engineering of heart valves (TEHV) promises to overcome the current limitations by  
86 constructing a living valvular substitute capable of physiological remodelling through exogenously  
87 implanted cells (reviewed in <sup>8</sup>). Among the different cells proposed so far, bone marrow-mesenchymal  
88 stromal cells (BM-MSCs) remain the ‘gold standard’;<sup>9</sup> though modest results have been reported in  
89 recent clinical trials.<sup>10-12</sup> Adventitial pericytes (APCs) represent a newly characterized clonogenic  
90 stromal cell population,<sup>13,14</sup> which reportedly surpassed MSCs in terms of purity and therapeutic  
91 potential,<sup>15,16</sup> and was also suitable for xenograft cellularization.<sup>17</sup> After selective immunomagnetic  
92 sorting from vascular tissue, APCs can be expanded through different passages whilst maintaining  
93 typical pericyte (PDGFR $\beta$  and CSPG4/NG2) and mesenchymal markers (vimentin, desmin, CD90,  
94 CD44, CD29, CD105, CD49a, CD49b, CD13, CD59, and CD73).

95 In models of ischemia, APC transplantation exerted remarkable therapeutic benefit by  
96 promoting reparative angiogenesis and inhibiting fibrosis.<sup>15,16</sup> MicroRNA-132 (miR-132) emerged  
97 from preclinical studies as one of the APC secreted factors responsible for main therapeutic actions.<sup>16</sup>  
98 The role of miR-132 in cardiovascular disease remains controversial. Transgenic overexpression of the  
99 miR-212/132 cluster results in pathological cardiac remodelling;<sup>18</sup> while other reports suggest that  
100 miR-132 promotes vascular growth.<sup>19</sup> These differences could be attributed to additional auxiliary  
101 binding of miR-212 to its targets and to the magnitude and context of miR-132 expression. Seminal  
102 evidence indicates that miR-132 directly targets the expression of MeCP2 (validated target) and  
103 calumenin (predicted target), which modulate osteogenesis by interfering respectively with the Wnt  
104 signalling pathway and vitamin K-dependent  $\gamma$ -carboxylation of matrix Gla protein.<sup>20-22</sup> Nonetheless, it  
105 remains unknown whether APCs could be resistant to calcification *via* a mechanism involving miR-  
106 132 signalling.

107 The aim of present study was three-fold: (1) to compare the susceptibility of human APCs and  
108 BM-MSCs to undergo osteochondrogenic transition following exposure to HP, (2) to determine the  
109 role of miR-132 in the above phenomena, and (3) to assess the suitability of APCs for cellularization  
110 of FDA-approved bioprosthetic material.

111

## 112 **Methods**

113 An extended version of material and methods is provided as online supplementary material.

### 114 **Cell isolation and culture**

115 Studies were performed on leftover material, according to the ethical principles recorded in the 1964  
116 Declaration of Helsinki, and covered by the following Research Ethics Committee approvals  
117 (06/Q2001/197 covering use of APCs, and 14/SW/1083 and 14/WA/1005 covering use of BM). All  
118 recruited subjects provided informed written consent. Human APCs were isolated and expanded from  
119 saphenous vein leftovers of patients undergoing coronary artery bypass graft surgery (performed at the  
120 Bristol Royal Infirmary Hospital, UK), as previously published.<sup>15, 16</sup> BM was obtained from femur  
121 heads of patients undergoing hip replacement surgery at the Avon Orthopaedic Centre (Southmead  
122 Hospital, UK) by using the Ficoll stratification method (see **Supplementary Material**). **Table 1** and **2**  
123 summarizes clinical and demographic data of APC and BM-MSC donors.

124 HEK293 cells (CRL-11268™, ATCC®. Gaithersburg, Maryland, US) were cultured in  
125 DMEM high glucose (31966-021, Gibco™, Thermo Fisher, UK), supplemented with 10% FBS  
126 (16140-071, Gibco™, Thermo Fisher, UK), and used in luciferase assays to validate miR-132 binding  
127 to the *in silico* predicted sites on selected targets. Human aortic endothelial cells (AorECs) (C-12271,  
128 Promocell, UK) were cultured in complete EGM2 following manufacturer's instructions.

### 129 **Osteogenesis**

130 HP (2.6mM inorganic phosphate) was used as osteogenic stimuli on APCs and BM-MSCs at passage  
131 3-6. Growing media were supplemented with 5 times less FBS and 2.6 mM HP buffer  
132 (Na<sub>2</sub>HPO<sub>4</sub>/NaH<sub>2</sub>PO<sub>4</sub>, pH 7.4). Previously published protocols were adapted,<sup>22, 23</sup> and media were  
133 replaced every 3 days. Calcification endpoint was assessed by cell monolayer cytochemistry (Alizarin  
134 Red and von Kossa stainings), *o*-cresoftalein method (ab102505, abcam, UK) on 0.6N HCl hidroacidic  
135 extracts as previously published.<sup>23, 24</sup> APCs and BM-MSCs from 4 donors each were assayed in  
136 technical triplicates and averaged for statistical analysis. RNA isolation and qPCR were performed to  
137 assess osteogenesis. Western blotting or enzyme-linked immunosorbent assays (ELISA) were used to  
138 validate gene expression studies.

### 139 **RNA isolation, RT and qPCR**

140 Total RNA was isolated according to a standardized phenol-chloroform protocol, using Qiazol reagent  
141 and miRNeasy mini Kit (217004, QIAGEN, Germany), and reverse-transcribed into single-stranded  
142 cDNA, using a High Capacity RNA-to-cDNA Kit (4387406, Applied Biosystems™, Thermo Fisher,  
143 UK), or specific Taqman microRNA assay primers with a TaqMan® MicroRNA Reverse  
144 Transcription Kit for the assessment of microRNAs (4366596, Applied Biosystems™, Thermo  
145 Fisher). Downstream qPCR amplifications of first-strand cDNA were performed using TaqMan®  
146 Universal PCR Master Mix, no AmpErase® UNG (4324018) or Power SYBR® Green PCR Master  
147 Mix (4367659) (both from Applied Biosystems™, Thermo Fisher) in an Applied Biosystems  
148 QuantStudio 5 Real-Time PCR System. The relative expression of each selected gene product was

149 calculated using the  $2^{-\Delta\Delta C_t}$  method. Additionally, absolute quantification of qPCR products was  
150 performed to compare the copy number of miR-132 transcripts expressed in APCs and BM-MSCs.  
151 Ten-fold serial dilutions of miR-132 template were performed for the standard curve. Slope and  
152 correlation of the standard curve were - 0.33 and 0.99, respectively. Spike-in Cel-miR-39 was added to  
153 cell conditioned media (CCM) and explanted swine aortic valves for normalization and quality control  
154 (219610, QIAGEN, Germany). All reactions were performed in technical triplicates. All primers and  
155 probes are listed in **Supplementary Table I**. APCs from 5 donors and BM-MSCs from 4 donors were  
156 assayed in technical triplicates.

### 157 **Protein isolation and western blotting**

158 RIPA buffer (R0278, Merck/Sigma-Aldrich, UK) or NE-PER™ Nuclear and Cytoplasmic Extraction  
159 Kit (78833, Thermo Scientific, UK) were used to isolate total protein or cytoplasmic/nuclear protein  
160 fractions for western blotting, following the manufacturer's protocols. All lysis buffers were  
161 supplemented with inhibitors of proteases (1/100 (v/v)) and phosphatases (1/50 (v/v)) (P8340 and  
162 P5726, Merck/Sigma-Aldrich, UK). Protein concentration was quantified using a BCA protein assay  
163 (23252, ThermoFisher Scientific, UK). Total protein (5–20 µg) was resolved onto 8–12% SDS-PAGE  
164 and blotted onto 0.2 µm pore size PVDF membranes (1620177, Bio-Rad, Hercules, CA, USA).  
165 Primary antibodies were incubated overnight at 4°C after blocking membranes for 1h, at RT in 5% fat-  
166 free milk or 3% BSA dissolved in TBST buffer (100 mM Tris, 150 mM NaCl, pH 7.5 and 0.05-0.1 %  
167 Tween-20). β-Actin or β-tubulin were used as a loading control for RIPA and cytoplasmic cell lysates;  
168 histone H4 or Laminin A/C for nuclear fractions. The list of primary antibodies and titrations used is  
169 shown in **Supplementary Table II**. Densitometric band analysis was performed using ImageJ  
170 software (National Institutes of Health, Bethesda, MD, USA; <https://imagej.nih.gov/ij/>) and Image Lab  
171 software (Bio-Rad, UK).

### 172 **Assays on conditioned media**

173 CCMs were collected and centrifuged at 10,000g for 3 min, at 4°C to remove cell debris and  
174 supernatants were kept at -80°C until analysis. CCMs were used in ELISA, lactate release and glucose  
175 consumption assays, for quantification of miR-132, and to condition cells and valves prior to functional  
176 assays.

177 *ELISAs* were performed to quantify protein expression in CCM from at least 4 APC and BM-  
178 MSC lines, with assays performed in technical triplicates. Immunoreactive levels were normalized to  
179 total protein concentration. The following factors were determined: VEGF (DY293B), ANGPT-1  
180 (DY923), BMP2 (DY355) (all from R&D Systems, Oxford, UK).

181 *Glucose consumption* and *lactate release* were assessed using Glucose-Glo™ assay and  
182 Lactate-Glo™ assay (J6021 and J5021, Promega, UK ). CCM from 4 APC and BM-MSC lines were  
183 assayed in technical triplicates. Appropriate standards and basal media were assayed in parallel.  
184 Glucose consumption was calculated as follows: Glucose consumption (mM)<sub>sample</sub> = [Glucose]<sub>basal media</sub>-

185 [Glucose]<sub>CCM sample</sub>. Relative Luminescence Units (RLU) were recorded using a GloMax® Discover  
186 Microplate Reader (Promega).

### 187 **Cell viability and proliferation in bovine pericardium**

188 APCs seeded on FDA-approved bovine pericardium (BP) and APCs seeded on plastic (2D control)  
189 were assessed using fluorescent calcein AM/ethidium homodimer III (EtDIII) Live/Dead assay  
190 (30002-T, Biotium Inc, Insight Biotech, UK) and Click-iT® EdU (5-ethynyl-2'-deoxyuridine) Assay  
191 (BCK-EDU488, baseclick GmbH, Merck/Sigma-Aldrich, UK), respectively, following the  
192 manufacturer's protocols. Three days before studying proliferation rate, EdU was incorporated to fresh  
193 media at 10µM final concentration. Nuclei were counterstained with 300nM 4',6-diamidino-2-  
194 phenylindole dilactate (DAPI) (D1306, ThermoFisher Scientific, UK) for imaging assessment (Zeiss  
195 Axio observer Z1 microscope). Images from at least 5 random fields were snapped unless otherwise  
196 indicated. In addition, MTS assay (G3582, CellTiter 96® Aqueous One Solution Cell Proliferation  
197 Assay, Promega, UK) was performed for colorimetric quantification of viability. All assays were  
198 performed on APCs from at least 4 donors in technical quintuplicates.

### 199 **3'-UTR luciferase constructs preparation, molecular cloning, and luciferase assays**

200 Online tools TargetScan, PITA and miRWalk2.0 were used to predict *in silico* the putative 3'UTR  
201 target binding sites of miR-132 (hsa-miR-132-3p, MIMAT0000426). UCSC Genome Browser was  
202 consulted to obtain the 3'UTR oligonucleotide sequences listed in **Supplementary Table III**. *PmeI*  
203 (GTTT/AAAC) and *NotI* (GC/GGCCGC), and *SalI* (G/TCGAC) endonuclease restriction sites were  
204 inserted into the predicted sequences at 5' and 3' ends, respectively, to confirm oligonucleotide  
205 cloning into pmiRGLO Dual Luciferase miRNA Target Expression Vector (E1330, Promega, UK).  
206 Heat shock transformation was used to amplify luciferase plasmid construct in JM109 *E. coli*.  
207 Luciferase plasmid construct preparations were then co-transfected with scramble sequences or miR-  
208 132 mimic/inhibitor into 80% confluent HEK293 cell monolayers. Lipofectamin LTX (15338030,  
209 Thermo Fisher, UK) was used as lipotransfectant reagent. Luciferase assays were performed using a  
210 Dual-Glo® Luciferase Assay System (E2920, Promega, UK) following the manufacturer's  
211 instructions.

### 212 **AgomiR and antagomiR assays**

213 APCs were transfected with 25nM antagomiR-132 or agomiR-132 or scramble (Scr) controls using  
214 lipofectamin RNAiMAX (13778075, Invitrogen, Thermo Fisher, UK).

### 215 **Ex vivo model of swine aortic valve calcification**

216 *Ex vivo* valve calcification was modelled in explanted aortic valves (EAV) from 6-month old male  
217 pigs using 3mM HP stimulation for 5 or 7 days, as previously described.<sup>24, 25</sup> Histological assessment  
218 and RNA isolation was carried out in harvested samples. Alizarin Red (ARS), Elastic van Giesson  
219 (EVG), Movat or Alcian Blue/Sirius Red (AB/SR) stainings were performed on valves from 4 swine  
220 (in duplicate) to quantify calcification, elastin and collagen/proteoglycans. Active osteogenesis was  
221 studied by qPCR.

222 **APC engineering of decellularised bovine pericardium**

223 Commercially FDA-approved glutaraldehyde cross-linked BP clinically certified for clinical use was  
224 seeded with APCs at increasing seeding density up to 32,000 cell/cm<sup>2</sup>. Unseeded pericardium was  
225 used as a negative control. Endpoints were antigenic profile preservation of seeded cells, viability, and  
226 proliferation. CCMs were also collected to perform the AorEC scratch ‘wound healing’ assay. . In  
227 addition, immunocytochemistry (ICC) analysis was applied to verify preservation of antigenic profile  
228 of APCs-engineered on BP

229 **Statistical analysis**

230 Continuous variables are shown as mean ± standard error of the mean (SEM) or median (IQR)  
231 depending on their distribution. Categorical variables are presented as percentages. Normally  
232 distributed variables were analyzed using the Student’s t test (two group comparison) or one-way  
233 analysis of variance (multiple comparisons ANOVA), as appropriate. Homoscedasticity was assessed  
234 with the Levene test, and ANOVA post-hoc analysis included Tuckey or T3 Dunnet testing, as  
235 appropriate. Non-parametric tests, including the Mann–Whitney U test or the Kruskal-Wallis test,  
236 were used for data not normally distributed. Statistical significance was accepted at  $p < 0.05$ . Analyses  
237 were performed using SPSS 19.0 for Windows (SPSS, Inc., Chicago, IL, USA) or GraphPad Prism 5.0  
238 (GraphPad, La Jolla, CA, USA)) statistical packages.

239  
240  
241  
242  
243  
244  
245  
246  
247  
248  
249  
250  
251  
252  
253  
254  
255  
256  
257  
258

259 **Results**

260 **Antigenic profile of human APCs**

261 Flow cytometry analysis showed that culture-expanded APCs expressed pericyte and mesenchymal  
262 markers, such as CD105, CD90, CD44, NG2/CSPG4, and PDGFR $\beta$ , while being negative for CD31,  
263 CD146, and CD45 (**Supplementary Figure 1A**), in line with previous publications.<sup>15, 26</sup>

264 **Human APCs are resistant to calcification induced by high inorganic phosphate**

265 During the development of VHD, inorganic phosphate accumulation triggers the transformation of  
266 cardiac valves into heterotopic bone-like tissue.<sup>27</sup> Here, we investigated if high levels of inorganic  
267 phosphate in the culture medium could induce osteochondrogenic transition of human APCs. BM-  
268 MSCs, used here as an alternative cell comparison, showed accumulation of calcium (Alizarin Red  
269 staining) and phosphate (von Kossa staining) after 4 day stimulation with HP, whereas no staining  
270 could be appreciated in either assays on APCs after 12 days of HP (**Figure 1A**). A large increase in  
271 calcium content was confirmed in BM-MSCs using the *o*-cresoftalein colorimetric method (**Figure**  
272 **1B**) while negligible readings were reported in APCs (data not shown). Calcification was further  
273 evaluated in APCs using a more potent stimulus consisting of 4- and 10-days incubation in DMEM  
274 supplemented with 4.5g/mL glucose (25mM) (high glucose, HG) and HP. This combination induced a  
275 massive increase in mineralization and cell death in BM-MSCs after only 24h (**Supplementary**  
276 **Figure 1B**). In contrast, calcium deposits were modestly detected in APCs after 10 days, as assessed  
277 by Alizarin Red staining (**Figure 1C**) or the *o*-cresophtalein method (**Figure 1D**). Moreover, several  
278 molecular readouts of osteoblast differentiation were studied at the mRNA and protein level. QPCR  
279 demonstrated that HP induced the acquisition of an osteoblast-like phenotype by BM-MSCs, as  
280 indicated by the increase in *BMP2*, *RUNX2*, *SOX9*, *SP7/OSX*, and *SPPI* mRNA expression compared  
281 with unstimulated BM-MSCs; whereas, the reverse was seen in APCs, which exhibited downregulated  
282 *RUNX2*, *SOX9*, *SP7/OSX*, and *SPPI* expression following HP stimulation as compared with the  
283 unstimulated condition (**Figure 1E**). Western blotting analysis showed that BMP2 (a morphogenetic  
284 protein implicated in bone and cartilage formation), RUNX2 (Runt-related transcription factor 2, a key  
285 transcription factor associated with osteoblast differentiation) and OCN (Osteocalcin, a secreted  
286 osteoblast morphogen that influences matrix mineralization) were all induced by HP in BM-MSCs,  
287 whereas all the studied osteogenic proteins were downregulated in HP-stimulated APCs (**Figure**  
288 **1F&G**). Moreover, HP increased the levels of BMP2 in BM-MSC-derived CCM. APCs showed  
289 secreted BMP2 concentrations comparable to those of BM-MSCs under unstimulated conditions, but  
290 they did not secrete extra protein under HP stimulation (**Figure 1 H-I**). A time course of osteoblast  
291 marker expression was additionally studied in HP-stimulated APCs, with results showing a general  
292 downregulation following extended stimulation (**Supplementary Figure 2A&B**). Moreover, no  
293 calcification was detectable at any time point and APC viability was preserved (**Supplementary**  
294 **Figure 2C&D**).

295



296 **HP induces miR-132 expression in human APCs**

297 We next investigated if HP regulates the expression of miR-132; the rationale being this microRNA is  
298 reportedly relevant for human APC ability to promote tissue repair through molecular mechanisms  
299 that can also control extracellular matrix remodelling.<sup>16</sup> Interestingly, HP induced an early (day 4) up-  
300 regulation of intracellular miR-132 (**Figure 2A**) which was sustained until day 12 (**Supplementary**  
301 **Figure 3**). However, miR-132 levels in APC-derived CCM remained unchanged between  
302 unstimulated and HP-stimulated conditions (**Figure 2B**). In contrast, BM-MSCs showed reduced  
303 intracellular levels and increased extracellular levels of miR-132 in response to HP as compared with  
304 the unstimulated condition (**Figure 2C&D**). An absolute quantification of miR-132 copy numbers  
305 revealed a large variability regarding BM-MSCs, whereas APCs showed a significant increase in  
306 intracellular miR-132 following HP stimulation (**Figure 2E**).

307 Using three bioinformatics tools (TargetScan, PITA, and miRWalk2.0), we found that miR-  
308 132 directly targets several genes associated with physiologic and ectopic osteogenic processes,  
309 including *CALU*, *GDF5*, *ACVRI*, *GLUT1*, *MECP2*, *METTL25*, *EP300*, *HBEGF*, and *SMAD7*.  
310 Interestingly, qPCR data indicated that HP-induced upregulation of miR-132 expression by APCs was  
311 associated with downregulation of all the above candidate targets, apart from *HBEGF* (**Figure 3A**).  
312 Luciferase constructs were prepared to validate the regulatory effect of miR-132 on the *in silico*  
313 predicted sites (**Supplementary Figure 4A**). Different endonuclease restriction enzyme digestions  
314 were used in parallel to validate the insertion of miR-132 targets (**Supplementary Figure 4B**).  
315 Luciferase assays were then performed in HEK293 cells co-transfected with seven constructs from the  
316 list of predicted genes together with agomiR-132, antagomiR-132, or Scr sequences. Forced  
317 expression of the microRNA by agomiR-132 resulted in the downregulation of *CALU*, *GDF5*, *ACVRI*,  
318 *GLUT1*, *MECP2*, *METTL25*, and *EP300*, as it would be expected for genes that are under inhibitory  
319 control; whereas, antagomiR-132 caused a more subtle response, with only three *GDF5*, *ACVRI* and  
320 *EP300* being upregulated following miR-132 inhibition compared with Scr (**Figure 3B-H**). Moreover,  
321 after confirming that antagomiR-132 (**Figure 3I**) and agomiR-132 (**Supplementary Figure 5A**)  
322 oppositely modulate miR-132 expression in APCs, we asked if miR-132 inhibition could result in  
323 expressional changes of the osteogenic factors in APCs. As shown in **Figure 3J**, antagomiR-132  
324 caused a remarkable upregulation of *GLUT1* and induced a significant but milder increase in *CALU*  
325 expression under unstimulated conditions. In HP-stimulated APCs, antagomiR-132 induced *CALU*,  
326 *GDF5*, *AVCRI*, *GLUT1*, *MECP2*, *METTL25* and *EP300*, but not *HBEGF* or *SMAD7* (**Figure 3K**).  
327 Following transfection of APCs with agomiR-132, we found that three targets were consistently  
328 downregulated both under unstimulated or HP-stimulated conditions (*CALU*, *GDF5*, and *ACVRI*), two  
329 were reduced only under unstimulated conditions (*GLUT1* and *SMAD7*), or under stimulated  
330 conditions (*METTL25* and *EP300*), while no significant effect was seen regarding *MECP2* and *HBEGF*  
331 (**Supplementary Figure 5B&C**).

332

333 **HP stimulation induces glycolysis in BM-MSCs but not in APCs**

334 Induction of GLUT1 marks the glycolytic switch of stromal cells during osteoblast differentiation.<sup>28</sup>

335 As shown above, the opposite was seen in APCs, which manifested a reduction in *GLUT1* expression  
336 following the HP challenge. This data would suggest there was no glycolytic activation in stimulated  
337 APCs. To confirm this possibility, we next investigated the metabolic changes occurring in APCs and  
338 control BM-MSCs during forced osteochondrogenic differentiation. In BM-MSCs, HP stimulation  
339 increased glucose consumption and lactate and VEGFA secretion, without altering ANGPT-1 release.  
340 In contrast, in APCs, glucose and lactate did not change in response to HP (**Supplementary Figure**  
341 **6A-C**). Moreover, APCs showed lower VEGF and higher ANGPT-1 secreted levels compared with  
342 BM-MSCs (**Supplementary Figure 6C&D**).

343 **Inhibition of miR-132 triggers molecular changes instigating osteochondrogenic transition of**  
344 **human APCs.**

345 We next assessed if inhibition of miR-132 could weaken the capacity of APCs to resist forced  
346 calcification by HP/HG stimulation. Alizarin red staining revealed mildly increased calcification in  
347 miR-132 knocked-down APCs compared with Scr-transfected APCs (**Figure 4A**); colorimetric  
348 analysis confirmed the inductive effect of miR-132 inhibition on calcium deposits after 5 days  
349 exposure to HP/HG (**Figure 4B**). Such an induction resulted in significantly increased glucose  
350 consumption and lactate release in miR-132 knocked-down APCs (**Figure 4C&D**). Acquisition of an  
351 osteogenic-like profile following miR-132 inhibition was confirmed by the concomitant upregulation  
352 of BMP2 and RUNX2 proteins, in association with enhanced GLUT1 expression (**Figure 4 E&F**).

353 **The APC-derived secretome prevents osteogenic differentiation of swine aortic valves through**  
354 **miR-132 signalling**

355 Next, we asked if factors secreted by APCs could pass the anti-calcific phenotype to valvular tissue.  
356 To this purpose, we tested the effect of the CCM derived from naïve APCs or antagomiR-132  
357 transfected APCs on explanted EAVs exposed for 7 days to HP stimulation. EBM2 and Scr-  
358 transfected APC-derived CCM were used as controls (experimental protocol illustrated in **Figure 5A**).  
359 EAVs conditioned with naïve APC-derived CCM expressed greater amounts of miR-132 compared  
360 with EAVs exposed to EBM2 (**Figure 5B**). In addition, HP stimulation increased the expression of  
361 *BMP2*, *RUNX2*, *SOX9*, and *SPPI* in EAVs (**Supplementary Figure 7A&B**). The inductive effect of  
362 HP on osteoblastic markers was inhibited by the APC-derived CCM (**Figure 5C-F**). AntagomiR-132  
363 transfection reduced the levels of miR-132 in the APC-derived CCM by 65% compared with Scr-  
364 transfected APCs (p<0.01, data not shown). Moreover, miR-132 inhibition abolished the ability of  
365 APC-derived CCM to induce the expression of miR-132 in EAVs, as demonstrated by a reduction  
366 relative to the Scr-transfected APC CCM (**Figure 5G**). Likewise, miR-132 inhibition increased the  
367 expression of osteoblastic markers compared with Scr control, apart SOX9 which remained unaltered  
368 (**Figure 5H-K**).

369 HP stimulation enhanced elastin (EVG staining, dark purple blue) and collagen content  
370 (Movat staining, yellow) in EAVs (**Supplementary Figure 7C**). The above effects were blunted by  
371 the naïve APC-CCM, but this action was reversed by miR-132 silencing of APCs (**Figure 5L&M**).  
372 Calcification was induced in EAVs following 7 days of HP stimulation, as assessed using the Alizarin  
373 Red staining. This effect was remarkably attenuated by the naïve APC-derived CCM as well as by the  
374 CCM derived by antagomiR-132 transfected APCs (**Figure 5N**), suggesting the participation of  
375 additional factors contained in the CCM.

#### 376 **Effect of HP on extracellular matrix proteins production by human APCs**

377 Having demonstrated that factors secreted by APCs could inhibit osteochondrogenic transformation of  
378 EAVs, we sought to investigate the influence of HP on APC production of collagen and GAG  
379 proteins. There was a 1.6-fold increase in collagen protein released by APCs following HP stimulation  
380 (**Figure 6A**). APCs are also a natural source of GAGs, mainly N-sulphated, but HP did not produce  
381 any significant upregulation of GAGs (**Figure 6 B**).

#### 382 **Incorporation of APCs into bovine pericardium**

383 Next, we investigated if APCs could be successfully seeded onto FDA-approved decellularized BP.  
384 Three different cell densities were tested using APCs from 5 donors, with BP patches being examined  
385 after 5 and 10 days of culture in static conditions. The seeding protocol of this and subsequent studies  
386 are summarised in **Figure 7A**. APC proliferation (EdU and MTS) and viability (Calcein AM/EtDHIII)  
387 in the BP were compared with data obtained from the 2D culture system. At a seeding density of  
388 32,000 cell/cm<sup>2</sup>, BP-seeded APCs showed an excellent viability rate, with constant increase in  
389 proliferation rate as compared with day 1 (2.89±0.26 and 1.84±0.29 fold at day 6 and 12, respectively)  
390 (**Figure 7B-D**). IHC analysis confirmed the maintenance of the typical antigenic profile by seeded  
391 APCs (**Figure 7E**) and their localization within the BP structure (**Figure 7F**). Moreover, in a scratch  
392 assay of AorECs performed under HP conditions, the CCM from APC-embedded BP increased the  
393 wound closure as compared with the CCM of unseeded pericardium (**Figure 7G**).

394  
395  
396  
397

398 **Discussion**

399 This is the first study reporting the use of human APCs to engineer an FDA-approved BP patches used  
400 to manufacture biological prosthetic heart valves; the main findings being (1) the superior ability  
401 APCs to resist to osteochondrogenic induction by HP through a mechanism involving the miR-132  
402 and (2) the capacity of APCs to transfer the advantageous phenotype to swine cardiac valves.  
403 Importantly, APCs were expanded from saphenous vein tissue leftovers of patients undergoing  
404 coronary artery bypass surgery. The donors of BM-MSCs, used as a cell comparison, were younger  
405 than APC donors and did not have clinical signs of cardiovascular disease. Therefore, the superior  
406 profile of APCs cannot be attributed to a healthier condition of the donor subjects. Finally, we showed  
407 the feasibility of using pericytes for cellularization of valvular prostheses; results being in line with  
408 our previous data on pericyte-engineered CorMatrix grafts for the correction of congenital heart  
409 defects.<sup>17</sup>

410 Autologous, cell-based, tissue-engineered heart valves with regeneration potential have been  
411 suggested to overcome the limitations of currently used bioprostheses, in particular their tendency  
412 towards calcific degeneration. BM-derived mononuclear cells, which contain a cocktail of progenitor  
413 cells and leukocytes, have been incorporated in minimally invasive protocols for both cell harvest  
414 (sternal aspirate) and valve delivery (through a mini-sternotomy or transcatheter aortic valve  
415 implantation).<sup>9, 29</sup> More defined cell populations such as MSCs have been also proposed. MSCs can be  
416 easily harvested and expanded from multiple tissue sources. Accordingly, they represent the cell of  
417 choice, with several studies suggesting the therapeutic utility in animal models.<sup>8, 30, 31</sup> Comparison  
418 studies attempted to determine the superiority of MSCs vs. other cell types, such as BM-MNCs or  
419 CD133<sup>+</sup> aortic-derived cells.<sup>10, 32, 33</sup> Nonetheless, these assessments focused on functional readouts,  
420 but did not pay much attention to the mechanistic rationale for choosing a specific cell population.

421 Here, we provide multiple levels of evidence for the superior capacity of human APCs to  
422 resist osteochondrogenic induction by HP. In contrast to BM-APCs, APCs showed a downregulation  
423 of major osteogenic markers following HP challenge, including BMP2, RUNX2, SOX9, COL1A1,  
424 OPN, and OCN. These factors form an integrated molecular network relevant for the development and  
425 progression of VHD.<sup>8</sup> Recent studies have pinpointed the key role of miRs during the pathogenesis of  
426 cardiovascular calcification. Cui et al showed miR-204 acts as a central regulator of vascular smooth  
427 cell calcification by targeting Runx2.<sup>34</sup> MiR-141 reportedly inhibited the osteogenic differentiation of  
428 porcine valvular interstitial cells through a BMP2 dependent pathway.<sup>35</sup> A miR microarray study  
429 showed that miR-638 inhibits human aortic valve interstitial cell osteogenic differentiation by  
430 inhibiting Sp7 transcription factor.<sup>36</sup> Previous studies have highlighted the importance of miR-132, a  
431 highly conserved miR transcribed from an intergenic region on human chromosome 17, in tumoral  
432 angiogenesis,<sup>19</sup> cardiac adverse remodelling following aortic coarctation,<sup>18</sup> and benefit of APC therapy  
433 in a murine model of myocardial infarction.<sup>16</sup> To the best of our knowledge, this is the first report  
434 indicating miR-132 plays a key role in the human APC resistance to calcification. Results from studies

435 of gene expression following HP stimulation, *in silico* analysis, luciferase assays, and silencing/forced  
436 expression of miR-132 level indicate that this miR could counteract several downstream targets  
437 relevant to epigenetic mechanisms (methylation [MECP2 and METTL25] and acetylation [EP300]),  
438 transcriptional regulation of the TGF- $\beta$ /SMAD signaling pathway (GDF5 and ACVR1) and  
439 metabolism (GLUT1). The full list of these genes and related function is reported in **Table 3**. The  
440 inhibitory effect of miR-132 on GLUT1 indicate that APCs may have the capacity to modulate  
441 glycolysis in response to HP stimulation. Noteworthy, miR-132 was recently described to mediate the  
442 ‘metabolic shift’ of prostate cancer cells *via* GLUT1 regulation.<sup>37</sup> Moreover, GLUT1 is overexpressed  
443 during osteoblast differentiation, which underlies the acquisition of the glycolytic profile necessary for  
444 increased energy requirements of such a demanding transformation.<sup>28</sup> Moreover GLUT1 suppresses  
445 the AMPK-dependent proteasomal degradation of RUNX2, prolonging its activation.<sup>28</sup> In line with  
446 these concepts, we report that BM-MSCs, but not APCs, showed increased glucose consumption and  
447 lactate release in response to HP. Importantly, inhibition of miR-132 caused an increase of both the  
448 glycolytic markers and well as an induction of GLUT1, RUNX2, and BMP2 in HP-stimulated APCs.  
449 BMP2 is a strong osteogenic morphogen and an upstream regulator of RUNX2, which in turn acts as  
450 a master transcription factor regulating the expression of SPPI, alkaline phosphatase, Osterix/SP7, and  
451 BGLAP, thereby promoting osteoblast differentiation. Altogether, these results suggest that the  
452 expression of miR-132 by APCs is essential to inhibiting the metabolic switch during osteogenic  
453 transition.

454 Porcine and bovine pericardial valves are the most commonly implanted prostheses for aortic  
455 valve replacement surgery in the UK; and there is hope that immunologic barriers, which contribute to  
456 valve degeneration, could be overcome with the use of tissues from genetically modified pigs lacking  
457 xenogeneic antigens.<sup>38, 39</sup> Cellularization with autologous or off-the-shelf allogeneic pericytes could  
458 help in this endeavour, as evidence points to the immunomodulatory properties of these cells.<sup>40</sup> In  
459 addition, we show for the first time that pericytes from the human vasculature secrete factors that can  
460 convey anti-calcific cues to explanted swine valves. The involvement of miR-132 is likely considering  
461 that (1) valves exposed to the APC-derived CCM showed an increase in miR-132 levels together with  
462 resistance to osteochondrogenic transformation, and (2) antagomiR treatment of APCs precluded these  
463 benefits. It should be noted that the inhibition of calcium deposit by the APC-derived CCM was  
464 maintained after antagomiR-132 treatment. Therefore, it is possible that other factors contained in the  
465 CCM have participated in transferring anticalcific properties to the valve. Nonetheless, the antagomiR  
466 treatment could not inhibit miR-132 completely; the residual microRNA content could have been  
467 enough to inhibit valve calcification. It remains to be elucidated whether the valvular miR-132 was  
468 captured from the APC-CCM or was endogenously produced by the swine valve.

469 Cardiac pericytes have been successfully used to engineer xenogenic material currently  
470 employed for cardiovascular reconstructive surgery.<sup>17</sup> The present study confirms the capacity of vein-  
471 derived pericytes to home and proliferate after seeding onto BP patches approved for clinical use and

472 to secrete factors enabling the recruitment of endothelial cells, even in the presence of HP  
473 concentrations.

474 **Perspectives and limitations**

475 Altogether, these findings provide several exciting lines of new evidence pointing towards novel  
476 bioengineering solutions based on human pericytes for the treatment of valvular defects. There were  
477 limitations in the study. Although the effect size favouring of APCs vs. BM-MSC was large, the  
478 number of biological replicates was small, thus requiring replication in larger cohorts. The primary  
479 endpoint of the study was to provide a clear and strong mechanistic rationale for the use of pericytes;  
480 thereby establishing a solid and ethically acceptable foundation for preclinical studies in large animal  
481 models. We are convinced that the evidence collected so far warrants to pursue such an *in vivo*  
482 validation as a step toward the clinical use of novel bioengineered prostheses.

483

484 **Acknowledgments**

485 Graciela Sala-Newby (PhD) and Thomas Hathway (Mlt) from Bristol Medical School (Translational  
486 Health Sciences, University of Bristol) helped with the expansion of pDNA constructs. Hannah Martin  
487 (Mlt) and Paul Savage (Mlt) from Bristol Medical School (Translational Health Sciences, University  
488 of Bristol) provided technical support for histological sample processing. Patient enrollment and  
489 sample collection was performed by research nurses and administrators from the NIHR Biomedical  
490 Research Centre at University Hospitals Bristol NHS Foundation Trust and the University of Bristol.  
491 Dr. Niall Sullivan from Avon Orthopaedic Centre, Southmead Hospital (Bristol, U.K) collected bone  
492 marrow samples.

493 **Funding**

494 This study was funded by the British Heart Foundation (BHF) Centre for Cardiovascular Regenerative  
495 Medicine Award (II)- Centre for Vascular Regeneration” (RM/17/3/33381) and BHF project grants  
496 PG/15/95/31853 and PG/18/38/33707 and by the Heart Research UK (HRUK) (Grant number  
497 RG2656/17/20). In addition, this study was supported by the NIHR Biomedical Research Centre at  
498 University Hospitals Bristol and Weston NHS Foundation Trust and the University of Bristol. The  
499 views expressed are those of the author(s) and not necessarily those of the NIHR or the Department of  
500 Health and Social Care

501 **Disclosures**

502 None to declare

503 **Figure Legends**

504 **Figure 1: Effect of high phosphate on calcification and osteoblast differentiation. A,**  
505 Representative microscopy photographs of Alizarin Red (calcium deposits) and von Kossa (phosphate  
506 deposits) stainings captured from unstimulated and stimulated BM-MSCs (4 days incubation in high  
507 phosphate, HP) and APCs (12 days in HP). **B,** Colorimetric quantification of calcium in BM-MSCs  
508 normalized by total protein content. \*\*\* $p < 0.001$  vs. unstimulated. **C&D,** Representative images  
509 (Alizarin Red staining) (**C**) and bar graph (**D**) showing the calcium content (assessed using the *o*-  
510 cresoftalein assay) in APCs after 5 and 10 days of incubation in a calcifying medium consisting of  
511 combination of high glucose (HG) and HP, in comparison with BM-MSCs or APCs stimulated with  
512 HP only. \*\*\* $p < 0.001$  vs. BM-MSCs. † $p < 0.05$  vs. APCs HP. **E,** Changes in mRNA expression levels of  
513 typical osteoblast markers in BM-MSCs and APCs following HP conditioning relative to unstimulated  
514 condition in corresponding cell type. \* $p < 0.05$  vs. unstimulated. **F&G,** Representative western blotting  
515 images and bar graph illustrating the results from band densitometry analysis. Data indicate the fold  
516 changes in intracellular protein levels following HP conditioning relative to unstimulated condition in  
517 corresponding cell type. Band densitometries were normalized by  $\beta$ -actin. \* $p < 0.05$  vs. unstimulated.  
518 **H&I,** Levels of BMP2 in conditioned media (CCM) collected from BM-MSCs and APCs under basal  
519 and HP conditions. **H,** BMP2 was quantified in CCMs using ELISA and normalized for total protein  
520 content. **I,** Representative image of Western blotting, which shows data in line with the ELISA results.  
521 All experiments were performed in cells isolated from 4 different donors, using three technical  
522 triplicates. Data are presented as mean  $\pm$  SEM.

523 **Figure 2: Effect of high phosphate on miR-132 expression. A,** Intracellular expression levels of  
524 miR-132 in APCs under basal conditions (unstimulated) and after 4-day conditioning with high  
525 phosphate (HP-stimulated). **B,** MiR-132 content in CCM derived from APCs under basal conditions  
526 and after 4-day conditioning with HP. **C,** Intracellular expression levels of miR-132 in BM-MSCs  
527 unstimulated and HP-stimulated for 4 days. **D,** MiR-132 content in BM-MSC-derived CCM. **E,** MiR-  
528 132 number of copies expressed by APCs and BM-MSCs under unstimulated or HP-stimulated  
529 conditions. Intracellular expression of miR-132 was normalized by U6 snRNA expression. Cel-miR-  
530 39 spike-in was used during RNA extraction for subsequent normalization in RT-qPCR assays. All  
531 experiments were performed in cells isolated from 4 different donors in technical triplicates. \* $p < 0.05$   
532 and \*\* $p < 0.01$  vs. basal unstimulated conditions.

533

534 **Figure 3: miR132 modulates osteoblastic gene expression in human APCs. A,** Bar graph showing  
535 the expression of candidate target genes in HP-stimulated APCs relative to the expression of  
536 unstimulated condition (dotted line). Intracellular levels of miR-132 (miR-132-3p, green bar) were  
537 normalized by U6 snRNA expression, while mRNA targets (black bars) were normalized by GAPDH.  
538 \* $p < 0.05$  unstimulated. **B-H,** Bar graphs showing the results of luciferase assays in HEK293 cells co-  
539 transfected with miR-132 mimic (agomiR), miR-132 inhibitor (antagomiR), or Scramble (SCR). RLU



540 for *Renilla sp* luciferase was used as internal control for each reading after 48h of the transfection.  
541 \* $p < 0.05$  vs. SCR. **I**, miR-132 expression was transiently knocked-down in antagomiR experiments  
542 either under unstimulated conditions or following stimulation with HP for 4 days. \* $p < 0.05$  vs. SCR.  
543 **J&K**, Bar graph showing the effect of miR-132 inhibition on predicted targets under  
544 unstimulated conditions (**J**) and following stimulation with HP (**K**) \* $p < 0.05$  vs. SCR. All experiments  
545 were performed in APCs isolated from 4 different donors using technical triplicates. Luciferase assays  
546 were performed in technical quintuplicates. Data are represented as mean  $\pm$  SEM;

547

548 **Figure 4. MiR-132 inhibition blunts APC resistance to high phosphate/high glucose induced**  
549 **osteogenesis.** **A**, Representative microphotographs of Alizarin red stained APCs. Cells were cultured  
550 in HP/HG for 10 days, following transfection with antagomiR-132 or scramble (SCR) sequence and  
551 compared with unstimulated SCR-transfected APCs. **B**, Colorimetric quantification of calcium  
552 deposits in APCs subjected to the same protocol as in (**A**) with measurements performed at 5 and 10  
553 days. **C&D**, Relative glucose consumption and lactate release in APCs subjected to the same protocol  
554 as in (**A**) with measurements performed at 5 and 10 days. **E&F**, representative Western blotting of  
555 calcifying markers in APC cytoplasm (**E**) and nuclear (**F**) fractions from 2 different donors. All the  
556 other experiments were performed in cells isolated from 4 different donors in technical triplicates.  
557 Data are represented as mean  $\pm$  SEM; \* $p < 0.05$ , \*\* $p < 0.01$ , and \*\*\* $p < 0.001$  vs. Unstimulated APCs;  
558  $^{\dagger}p < 0.05$ , and  $^{\dagger\dagger\dagger}p < 0.001$  vs. HP-Stimulated SCR-APCs.

559

560 **Figure 5. Effect of APC-derived secretome on an *ex vivo* swine model of aortic valve**  
561 **calcification.** **A**, Experimental protocol used to assess the effect of APC-derived conditioned medium  
562 (CCM) on the explanted aortic valve (EAV) model. In a first set of experiments, the CCM collected  
563 from naïve APC was added to the EAV assay. In a second set, APCs were transfected with  
564 antagomiR-132 or Scramble (SCR) and then the corresponding CCM (SCR APC-CCM or i132APC-  
565 CCM) was added to the EAV assay. In both conditions, EAVs were stimulated with HP (3.2mM),  
566 which resulted in induction of osteoblastic markers (see Supplementary Figure 7). **B-F**, Effect of the  
567 naïve APC-derived CCM on the relative expression of miR-132 (**B**), *BMP2* (**C**), *RUNX2* (**D**), *SOX9*  
568 (**E**) and *SPPI* (**F**) by HP-stimulated EAVs. EAVs treated with EBM2 instead of APC-CCM were used  
569 as a control. **G-K**, Effect of the CCM from APCs transfected with SCR or miR-132 inhibitor (i132) on  
570 gene expression by EAVs. AntagomiR-132 reduced the miR-132 levels to 0.35-fold the values of  
571 SCR-transfected APCs (data not shown). Changes in the expression (relative to SCR APC-CCM) of  
572 miR-132 (**G**), *BMP2* (**H**), *RUNX2* (**I**), *SOX9* (**J**) and *SPPI* (**K**) in HP-stimulated EAVs. **L**,  
573 Representative images of EVG-stained EAVs stimulated with HP (3.2mM) and treated with SCR  
574 APC-CCM or antagomiR-132 APC CCM. Bar graph showing quantitative values. **M**, Alcian  
575 blue/Sirius Red staining of EAVs stimulated with HP (3.2mM) and treated with SCR APC-CCM or  
576 antagomiR-132 APC CCM. Bar graph showing quantitative values. **N**, Representative

577 microphotographs of Alizarin Red staining showing calcification of EAV exposed to HP as compared  
578 with unstimulated condition, and the effect of CCM from SCR or antagomiR-132 transfected APCs.  
579 All experiments were performed in 2 aortic valve biopsies from 4 animals. APC-derived CCMs were  
580 pooled to condition each biopsy. Data are represented as mean  $\pm$  SEM; \*p < 0.05 vs. respective  
581 control in each panel.

582

583 **Figure 6. Effect of HP on extracellular matrix proteins production by APCs. A,** Collagen and  
584 hyaluronan (HA) species synthesis in unstimulated (control) and HP-stimulated APCs. Representative  
585 images of colorimetric analysis and bar graph showing changes vs. control. **B,** GAGs synthesis in  
586 unstimulated (control) and HP-stimulated APCs. Representative images and data of colorimetric  
587 analysis. All experiments were performed in APCs isolated from 3 donors in sixtuplicates. Data are  
588 represented as mean  $\pm$  SEM; \*p < 0.05.

589

590 **Figure 7. Incorporation of APC on FDA-approved bovine pericardium. A,** Schematic layout of  
591 the experimental protocol. **B,** Representative fluorescence microphotographs of FDA-approved bovine  
592 pericardium (BP) seeded with APCs at different densities; images captured at 5 and 10 days from  
593 seeding. Living cells are stained green by Calcein AM, while dead cells are stained red by Ethidium  
594 Homodimer-III (EtHDIII). **C,** Representative fluorescence microphotographs of EdU-positive  
595 proliferating APCs seeded in 2D plates or 3D BP. **D,** plotted MTS reading expressed as changes vs.  
596 day 1 values for the 2D and 3D conditions. **E,** Representative fluorescence microphotography  
597 showing antigenic profile retention by APC embedded on BP. **F,** Representative hematoxylin/eosin  
598 image of APCs seeded on BP. **G,** Assessment of the chemotactic properties of CCM from APC-  
599 embedded BP on AorECs in a scratch 'wound healing' assay. Representative image and plotted %  
600 GAP closure compared with time 0 (T0). Data are represented as mean  $\pm$  SEM; \*p<0.05.

601

602 **Table 1. Clinical and demographic data of APCs donors**

| <b>Baseline characteristics</b>                        |                    | <b>n = 20</b>            |
|--------------------------------------------------------|--------------------|--------------------------|
| Male sex, n (%)                                        |                    | 17 (80.95%)              |
| Age, median [IQR] (n)                                  |                    | 71.50 [60.25-75.00] (18) |
| Hypertension, n (%)                                    |                    | 16 (80%)                 |
| Diabetes mellitus, n (%)                               |                    | 2 (10%)                  |
| Hyperlipidaemia, n (%)                                 |                    | 16 (80%)                 |
| Body mass index (kg/m <sup>2</sup> ), median [IQR] (n) |                    | 28.90 [25.50-33.23] (18) |
| Smoking habit, n (%)                                   |                    |                          |
|                                                        | Non-smoker         | 7 (35%)                  |
|                                                        | Previous           | 9 (45%)                  |
|                                                        | Current            | 2 (10%)                  |
|                                                        | Unknown            | 2 (10%)                  |
| Previous Myocardial Infarction                         |                    |                          |
| Coronary Artery Disease, n (%)                         |                    |                          |
|                                                        | 0 vessels affected | n/a                      |
|                                                        | 1 vessel affected  | n/a                      |
|                                                        | 2 vessels affected | 2 (10%)                  |
|                                                        | 3 vessels affected | 16 (80%)                 |
|                                                        | Unknown            | 2 (10%)                  |
| Angina classification (CSS score), n (%)               |                    |                          |
|                                                        | Asymptomatic       | 1 (5%)                   |
|                                                        | I                  | 4 (20%)                  |
|                                                        | II                 | 3 (15%)                  |
|                                                        | III                | 7 (35%)                  |
|                                                        | IV                 | 3 (15%)                  |
|                                                        | Unknown            | 2 (10%)                  |

NYHA classification, n (%)

|         |         |
|---------|---------|
| I       | 6 (30%) |
| II      | 6 (30%) |
| III     | 6 (30%) |
| Unknown | 2 (10%) |

Left ventricular function, n (%)

|                  |          |
|------------------|----------|
| Good (>50)       | 12 (60%) |
| Moderate (30-50) | 6 (30%)  |
| Low (<30)        | n/a      |
| Unknown          | 2 (10%)  |

603

604

605

606

607

608

609

610

611

612

613

614

615

616

617

618 **Table 2. Clinical and demographic data of BM-MSC donors**

| <b>Baseline characteristics</b>                         | <b>(n =4)</b>          |
|---------------------------------------------------------|------------------------|
| Male sex, n (%)                                         | 2 (50%)                |
| Age, median [IQR] (n)                                   | 56.00 [41.50-75.75]    |
| Hypertension, n (%)                                     | 4 (100%)               |
| Diabetes mellitus, n (%)                                | 0 (0%)                 |
| Hyperlipidaemia (total cholesterol > 5.2 mmol/L), n (%) | 1 (25%)                |
| Body mass index (kg/m <sup>2</sup> ), median [IQR] (n)  | 31.70 [28.9-41.40] (4) |
| Smoking habit, n (%)                                    | 0 (0%)                 |
| Other pathologies                                       | None described         |

619  
620  
621  
622  
623  
624  
625  
626  
627  
628  
629  
630  
631

632 **Table 3. Targets of miR-132 in human APCs**

| Gene name                                                                           | Biological function                                                                                                                                                                                                                                                                                                                                                                                                                                                                                                                                                                                                                                                                                                                                                                                                                                                                                                                                                                                                                                                                        | Fold change induced by antagomir-132 |
|-------------------------------------------------------------------------------------|--------------------------------------------------------------------------------------------------------------------------------------------------------------------------------------------------------------------------------------------------------------------------------------------------------------------------------------------------------------------------------------------------------------------------------------------------------------------------------------------------------------------------------------------------------------------------------------------------------------------------------------------------------------------------------------------------------------------------------------------------------------------------------------------------------------------------------------------------------------------------------------------------------------------------------------------------------------------------------------------------------------------------------------------------------------------------------------------|--------------------------------------|
| <b><i>CALU</i></b> , Calumenin                                                      | CALU encodes a calcium-binding protein belonging to the multiple EF-hand CERC family of proteins together with reticulocalbin, ERC-55, and Cab45. It is localized in the endoplasmatic reticulum and the extracellular site. Calumenin is a physiological inhibitor of the vitamin K-dependent gamma-carboxylation of multiple N-terminal glutamate residues, being associated with the availability of active forms of matrix Gla protein (natural inhibitor of vascular calcification and atherosclerosis). It binds 7 calcium ions with a low affinity. Among its related pathways are NOTCH1 regulation of human endothelial cell calcification and response to elevated platelet cytosolic Ca <sup>2+</sup> . CALU polymorphism A29809G affects calumenin availability involving vascular calcification.                                                                                                                                                                                                                                                                              | 1.4                                  |
| <b><i>GDF5</i></b> , Growth Differentiation Factor 5                                | This gene encodes a secreted ligand of the TGF-beta (transforming growth factor-beta) superfamily of proteins. Ligands of this family bind various TGF-beta receptors leading to recruitment and activation of SMAD family transcription factors that regulate gene expression. It acts as a growth factor involved in bone and cartilage formation. During cartilage development regulates differentiation of chondrogenic tissue through two pathways. Firstly, positively regulates differentiation of chondrogenic tissue through its binding of high affinity with BMPR1B and of less affinity with BMPR1A, leading to induction of Smad1/5/8 complex phosphorylation and downstream signaling transduction. Secondly, negatively regulates chondrogenic differentiation through its interaction with NOG1. This protein regulates the development of numerous tissue and cell types, including cartilage, joints, brown fat, teeth, and the growth of neuronal axons and dendrites. Mutations in this gene are associated with chondrodysplasia and susceptibility to osteoarthritis | 2.3                                  |
| <b><i>ACVRI</i></b> , Activin A Receptor Type 1                                     | Activins are dimeric growth and differentiation factors which belong to the transforming growth factor-beta (TGF-beta) superfamily of structurally related signaling proteins. Diseases associated with ACVRI include Fibrodysplasia Ossificans Progressiva and Brain Stem Glioma. Among its related pathways are ERK Signaling and Signaling pathways regulating pluripotency of stem cells.                                                                                                                                                                                                                                                                                                                                                                                                                                                                                                                                                                                                                                                                                              | 1.8                                  |
| <b><i>GLUT1/SLC2A1</i></b> , Glucose transporter 1/Solute Carrier Family 2 Member 1 | This gene encodes a major glucose transporter in the mammalian blood-brain barrier. It acts as glucose transporter, 1 being the predominant isoform in vascular smooth muscle cells. Clones of human cells overexpressing the GLUT-1 transporter showed a high increase in intracellular glucose concentrations; it may play an important role in vascular calcification by transforming VSMCs into osteoblast-like cells. It has been found upregulated in osteogenic differentiation during bone formation and progenitor cells differentiation.                                                                                                                                                                                                                                                                                                                                                                                                                                                                                                                                         | 1.7                                  |
| <b><i>MECP2</i></b> , ethyl-CpG Binding Protein 2                                   | It is a member of a family of nuclear proteins related by the presence in each of a methyl-CpG binding domain (MBD). It mediates transcriptional repression through interaction with histone deacetylase and the corepressor SIN3A. HP causes the up-regulation of MECP2 and suppresses the expression of peroxisome proliferator-activated receptor-γ (PPAR-γ) and Klotho, a calcification antagonist, in VSMCs. MECP2 regulates osteoblast commitment in progenitor cells by abolishing adipogenic differentiation                                                                                                                                                                                                                                                                                                                                                                                                                                                                                                                                                                       | 2.0                                  |

|                                                         |                                                                                                                                                                                                                                                                                                                                                                                                                                                                                                                                                                                                                                                                                                                  |     |
|---------------------------------------------------------|------------------------------------------------------------------------------------------------------------------------------------------------------------------------------------------------------------------------------------------------------------------------------------------------------------------------------------------------------------------------------------------------------------------------------------------------------------------------------------------------------------------------------------------------------------------------------------------------------------------------------------------------------------------------------------------------------------------|-----|
| <b><i>METTL25</i></b> ,<br>Methyltransferase<br>Like 25 | Belongs to a class of methyltransferases implicated in hypermethylation and vascular calcification                                                                                                                                                                                                                                                                                                                                                                                                                                                                                                                                                                                                               | 1.4 |
| <b><i>EP300</i></b> , E1A<br>Binding Protein<br>P300    | This gene encodes the adenovirus E1A-associated cellular p300 transcriptional co-activator protein. It functions as histone acetyltransferase that regulates transcription via chromatin remodeling and is important in the processes of cell proliferation and differentiation. It mediates cAMP-gene regulation by binding specifically to phosphorylated CREB protein. This gene has also been identified as a co-activator of HIF1A (hypoxia-inducible factor 1 alpha), and thus plays a role in the stimulation of hypoxia-induced genes such as VEGF. Activated p300 acetyltransferase activity modulates aortic valvular calcification with osteogenic transdifferentiation and downregulation of Klotho. | 1.4 |

633 **References**

- 634 1. Hulin A, Hego A, Lancellotti P and Oury C. Advances in Pathophysiology of Calcific Aortic  
635 Valve Disease Propose Novel Molecular Therapeutic Targets. *Front Cardiovasc Med.* 2018;5:21.
- 636 2. Lerman DA, Prasad S and Alotti N. Calcific Aortic Valve Disease: Molecular Mechanisms  
637 and Therapeutic Approaches. *Eur Cardiol.* 2015;10:108-112.
- 638 3. Iung B and Vahanian A. Epidemiology of acquired valvular heart disease. *Can J Cardiol.*  
639 2014;30:962-70.
- 640 4. Yadgir S, Johnson CO, Aboyans V, Adebayo OM, Adedoyin RA, Afarideh M, Alahdab F,  
641 Alashi A, Alipour V, Arabloo J, Azari S, Barthelemy CM, Benziger CP, Berman AE, Bijani A,  
642 Carrero JJ, Carvalho F, Daryani A, Duraes AR, Esteghamati A, Farid TA, Farzadfar F, Fernandes E,  
643 Filip I, Gad MM, Hamidi S, Hay SI, Ilesanmi OS, Naghibi Irvani SS, Jurisson M, Kasaeian A, Kengne  
644 AP, Khan AR, Kisa A, Kisa S, Kolte D, Manafi N, Manafi A, Mensah GA, Mirrakhimov EM,  
645 Mohammad Y, Mokdad AH, Negoi RI, Thi Nguyen HL, Nguyen TH, Nixon MR, Otto CM, Patel S,  
646 Pilgrim T, Radfar A, Rawaf DL, Rawaf S, Rawasia WF, Rezapour A, Roever L, Saad AM, Saadatagah  
647 S, Senthilkumaran S, Sliwa K, Tesfay BE, Tran BX, Ullah I, Vaduganathan M, Vasankari TJ, Wolfe  
648 CDA, Yonemoto N, Roth GA and Global Burden of Disease Study Nonrheumatic Valve Disease C.  
649 Global, Regional, and National Burden of Calcific Aortic Valve and Degenerative Mitral Valve  
650 Diseases, 1990-2017. *Circulation.* 2020;141:1670-1680.
- 651 5. Iung B and Vahanian A. Epidemiology of valvular heart disease in the adult. *Nat Rev Cardiol.*  
652 2011;8:162-72.
- 653 6. Schmitt CA. Interventional cardiology: percutaneous pulmonary valve implantation: 1-year  
654 safety and efficacy reported in German study. *Nature reviews Cardiology.* 2011;8:186.
- 655 7. Pibarot P and Dumesnil JG. Prosthetic heart valves: selection of the optimal prosthesis and  
656 long-term management. *Circulation.* 2009;119:1034-48.
- 657 8. Jover E, Fagnano M, Angelini G and Madeddu P. Cell Sources for Tissue Engineering  
658 Strategies to Treat Calcific Valve Disease. *Front Cardiovasc Med.* 2018;5:155.
- 659 9. Weber B, Scherman J, Emmert MY, Gruenenfelder J, Verbeek R, Bracher M, Black M,  
660 Kortsmits J, Franz T, Schoenauer R, Baumgartner L, Brokopp C, Agarkova I, Wolint P, Zund G, Falk  
661 V, Zilla P and Hoerstrup SP. Injectable living marrow stromal cell-based autologous tissue engineered  
662 heart valves: first experiences with a one-step intervention in primates. *Eur Heart J.* 2011;32:2830-40.
- 663 10. VeDeppo MC, Detamore MS, Hopkins RA and Converse GL. Recellularization of  
664 decellularized heart valves: Progress toward the tissue-engineered heart valve. *J Tissue Eng.*  
665 2017;8:2041731417726327.
- 666 11. Gyongyosi M, Wojakowski W, Lemarchand P, Lunde K, Tendra M, Bartunek J, Marban E,  
667 Assmus B, Henry TD, Traverse JH, Moya LA, Surder D, Corti R, Huikuri H, Miettinen J, Wohrle J,  
668 Obradovic S, Roncalli J, Malliaras K, Pokushalov E, Romanov A, Kastrup J, Bergmann MW, Atsma  
669 DE, Diederichsen A, Edes I, Benedek I, Benedek T, Pejkov H, Nyolczas N, Pavo N, Bergler-Klein J,  
670 Pavo II, Sylven C, Berti S, Navarese EP, Maurer G and Investigators A. Meta-Analysis of Cell-based  
671 CaRdiac sTUDiEs (ACCRUE) in patients with acute myocardial infarction based on individual patient  
672 data. *Circ Res.* 2015;116:1346-60.
- 673 12. Liu B, Duan CY, Luo CF, Ou CW, Sun K, Wu ZY, Huang H, Cheng CF, Li YP and Chen  
674 MS. Effectiveness and safety of selected bone marrow stem cells on left ventricular function in  
675 patients with acute myocardial infarction: a meta-analysis of randomized controlled trials. *Int J*  
676 *Cardiol.* 2014;177:764-70.
- 677 13. Crisan M, Yap S, Casteilla L, Chen CW, Corselli M, Park TS, Andriolo G, Sun B, Zheng B,  
678 Zhang L, Norotte C, Teng PN, Traas J, Schugar R, Deasy BM, Badyrak S, Buhring HJ, Giacobino JP,  
679 Lazzari L, Huard J and Peault B. A perivascular origin for mesenchymal stem cells in multiple human  
680 organs. *Cell Stem Cell.* 2008;3:301-13.
- 681 14. Caplan AI. New MSC: MSCs as pericytes are Sentinels and gatekeepers. *J Orthop Res.*  
682 2017;35:1151-1159.
- 683 15. Campagnolo P, Cesselli D, Al Haj Zen A, Beltrami AP, Krankel N, Katare R, Angelini G,  
684 Emanuelli C and Madeddu P. Human adult vena saphena contains perivascular progenitor cells  
685 endowed with clonogenic and proangiogenic potential. *Circulation.* 2010;121:1735-45.
- 686 16. Katare R, Riu F, Mitchell K, Gubernator M, Campagnolo P, Cui Y, Fortunato O, Avolio E,  
687 Cesselli D, Beltrami AP, Angelini G, Emanuelli C and Madeddu P. Transplantation of human pericyte



- 688 progenitor cells improves the repair of infarcted heart through activation of an angiogenic program  
689 involving micro-RNA-132. *Circ Res.* 2011;109:894-906.
- 690 17. Alvino VV, Kilcooley M, Thomas AC, Carrabba M, Fagnano M, Cathery W, Avolio E,  
691 Iacobazzi D, Ghorbel M, Caputo M and Madeddu P. In Vitro and In Vivo Preclinical Testing of  
692 Pericyte-Engineered Grafts for the Correction of Congenital Heart Defects. *J Am Heart Assoc.*  
693 2020;9:e014214.
- 694 18. Foinquinos A, Batkai S, Genschel C, Viereck J, Rump S, Gyongyosi M, Traxler D,  
695 Riesenhuber M, Spannbauer A, Lukovic D, Weber N, Zlabinger K, Hasimbegovic E, Winkler J,  
696 Fiedler J, Dangwal S, Fischer M, de la Roche J, Wojciechowski D, Kraft T, Garamvolgyi R, Neitzel S,  
697 Chatterjee S, Yin X, Bar C, Mayr M, Xiao K and Thum T. Preclinical development of a miR-132  
698 inhibitor for heart failure treatment. *Nat Commun.* 2020;11:633.
- 699 19. Anand S, Majeti BK, Acevedo LM, Murphy EA, Mukthavaram R, Schepke L, Huang M,  
700 Shields DJ, Lindquist JN, Lapinski PE, King PD, Weis SM and Cheresch DA. MicroRNA-132-  
701 mediated loss of p120RasGAP activates the endothelium to facilitate pathological angiogenesis. *Nat*  
702 *Med.* 2010;16:909-14.
- 703 20. Kweon SM, Chi F, Higashiyama R, Lai K and Tsukamoto H. Wnt Pathway Stabilizes MeCP2  
704 Protein to Repress PPAR-gamma in Activation of Hepatic Stellate Cells. *PLoS One.*  
705 2016;11:e0156111.
- 706 21. Zhou YB, Zhang J, Peng DQ, Chang JR, Cai Y, Yu YR, Jia MZ, Wu W, Guan YF, Tang CS  
707 and Qi YF. Peroxisome proliferator-activated receptor gamma ligands retard cultured vascular smooth  
708 muscle cells calcification induced by high glucose. *Cell Biochem Biophys.* 2013;66:421-9.
- 709 22. Son BK, Kozaki K, Iijima K, Eto M, Kojima T, Ota H, Senda Y, Maemura K, Nakano T,  
710 Akishita M and Ouchi Y. Statins protect human aortic smooth muscle cells from inorganic phosphate-  
711 induced calcification by restoring Gas6-Axl survival pathway. *Circ Res.* 2006;98:1024-31.
- 712 23. Jover E, Marin F, Quintana M, Perez-Andreu J, Hurtado JA, Rodriguez C, Martinez-Gonzalez  
713 J, Gonzalez-Conejero R, Valdes M and Hernandez-Romero D. CALU polymorphism A29809G affects  
714 calumenin availability involving vascular calcification. *J Mol Cell Cardiol.* 2015;82:218-27.
- 715 24. Jover E, Silvente A, Marin F, Martinez-Gonzalez J, Orriols M, Martinez CM, Puche CM,  
716 Valdes M, Rodriguez C and Hernandez-Romero D. Inhibition of enzymes involved in collagen cross-  
717 linking reduces vascular smooth muscle cell calcification. *FASEB J.* 2018;32:4459-4469.
- 718 25. Akiyoshi T, Ota H, Iijima K, Son BK, Kahyo T, Setou M, Ogawa S, Ouchi Y and Akishita M.  
719 A novel organ culture model of aorta for vascular calcification. *Atherosclerosis.* 2016;244:51-8.
- 720 26. Gubernator M, Slater SC, Spencer HL, Spiteri I, Sottoriva A, Riu F, Rowlinson J, Avolio E,  
721 Katare R, Mangialardi G, Oikawa A, Reni C, Campagnolo P, Spinetti G, Touloumis A, Tavare S,  
722 Prandi F, Pesce M, Hofner M, Klemens V, Emanuelli C, Angelini G and Madeddu P. Epigenetic  
723 profile of human adventitial progenitor cells correlates with therapeutic outcomes in a mouse model of  
724 limb ischemia. *Arterioscler Thromb Vasc Biol.* 2015;35:675-88.
- 725 27. Bonetti A, Marchini M and Ortolani F. Ectopic mineralization in heart valves: new insights  
726 from in vivo and in vitro procalcific models and promising perspectives on noncalcifiable  
727 bioengineered valves. *J Thorac Dis.* 2019;11:2126-2143.
- 728 28. Wei J, Shimazu J, Makinistoglu MP, Maurizi A, Kajimura D, Zong H, Takarada T, Lezaki T,  
729 Pessin JE, Hinoi E and Karsenty G. Glucose Uptake and Runx2 Synergize to Orchestrate Osteoblast  
730 Differentiation and Bone Formation. *Cell.* 2015;161:1576-1591.
- 731 29. Emmert MY, Weber B, Wolint P, Behr L, Sammut S, Frauenfelder T, Frese L, Scherman J,  
732 Brokopp CE, Templin C, Grunenfelder J, Zund G, Falk V and Hoerstrup SP. Stem cell-based  
733 transcatheter aortic valve implantation: first experiences in a pre-clinical model. *JACC Cardiovasc*  
734 *Interv.* 2012;5:874-83.
- 735 30. Jana S, Tranquillo RT and Lerman A. Cells for tissue engineering of cardiac valves. *J Tissue*  
736 *Eng Regen Med.* 2016;10:804-824.
- 737 31. Hilfiker A, Kasper C, Hass R and Haverich A. Mesenchymal stem cells and progenitor cells in  
738 connective tissue engineering and regenerative medicine: is there a future for transplantation?  
739 *Langenbecks Arch Surg.* 2011;396:489-97.
- 740 32. Converse GL, Buse EE, Neill KR, McFall CR, Lewis HN, VeDepo MC, Quinn RW and  
741 Hopkins RA. Design and efficacy of a single-use bioreactor for heart valve tissue engineering. *J*  
742 *Biomed Mater Res B Appl Biomater.* 2017;105:249-259.

- 743 33. Vincentelli A, Wautot F, Juthier F, Fouquet O, Corseaux D, Marechaux S, Le Tourneau T,  
744 Fabre O, Susen S, Van Belle E, Mouquet F, Decoene C, Prat A and Jude B. In vivo autologous  
745 recellularization of a tissue-engineered heart valve: are bone marrow mesenchymal stem cells the best  
746 candidates? *J Thorac Cardiovasc Surg.* 2007;134:424-32.
- 747 34. Cui RR, Li SJ, Liu LJ, Yi L, Liang QH, Zhu X, Liu GY, Liu Y, Wu SS, Liao XB, Yuan LQ,  
748 Mao DA and Liao EY. MicroRNA-204 regulates vascular smooth muscle cell calcification in vitro  
749 and in vivo. *Cardiovasc Res.* 2012;96:320-9.
- 750 35. Yanagawa B, Lovren F, Pan Y, Garg V, Quan A, Tang G, Singh KK, Shukla PC, Kalra NP,  
751 Peterson MD and Verma S. miRNA-141 is a novel regulator of BMP-2-mediated calcification in  
752 aortic stenosis. *J Thorac Cardiovasc Surg.* 2012;144:256-62.
- 753 36. Jiao W, Zhang D, Wang D, Xu R, Tang L, Zhao M and Xu R. MicroRNA-638 inhibits human  
754 aortic valve interstitial cell calcification by targeting Sp7. *J Cell Mol Med.* 2019;23:5292-5302.
- 755 37. Qu W, Ding SM, Cao G, Wang SJ, Zheng XH and Li GH. miR-132 mediates a metabolic shift  
756 in prostate cancer cells by targeting Glut1. *FEBS Open Bio.* 2016;6:735-41.
- 757 38. Hickey GL, Grant SW, Bridgewater B, Kendall S, Bryan AJ, Kuo J and Dunning J. A  
758 comparison of outcomes between bovine pericardial and porcine valves in 38,040 patients in England  
759 and Wales over 10 years. *Eur J Cardiothorac Surg.* 2015;47:1067-74.
- 760 39. Smood B, Hara H, Cleveland DC and Cooper DKC. In Search of the Ideal Valve: Optimizing  
761 Genetic Modifications to Prevent Bioprosthetic Degeneration. *Ann Thorac Surg.* 2019;108:624-635.
- 762 40. Domev H, Milkov I, Itskovitz-Eldor J and Dar A. Immuno-evasive pericytes from human  
763 pluripotent stem cells preferentially modulate induction of allogeneic regulatory T cells. *Stem Cells*  
764 *Transl Med.* 2014;3:1169-81.

765

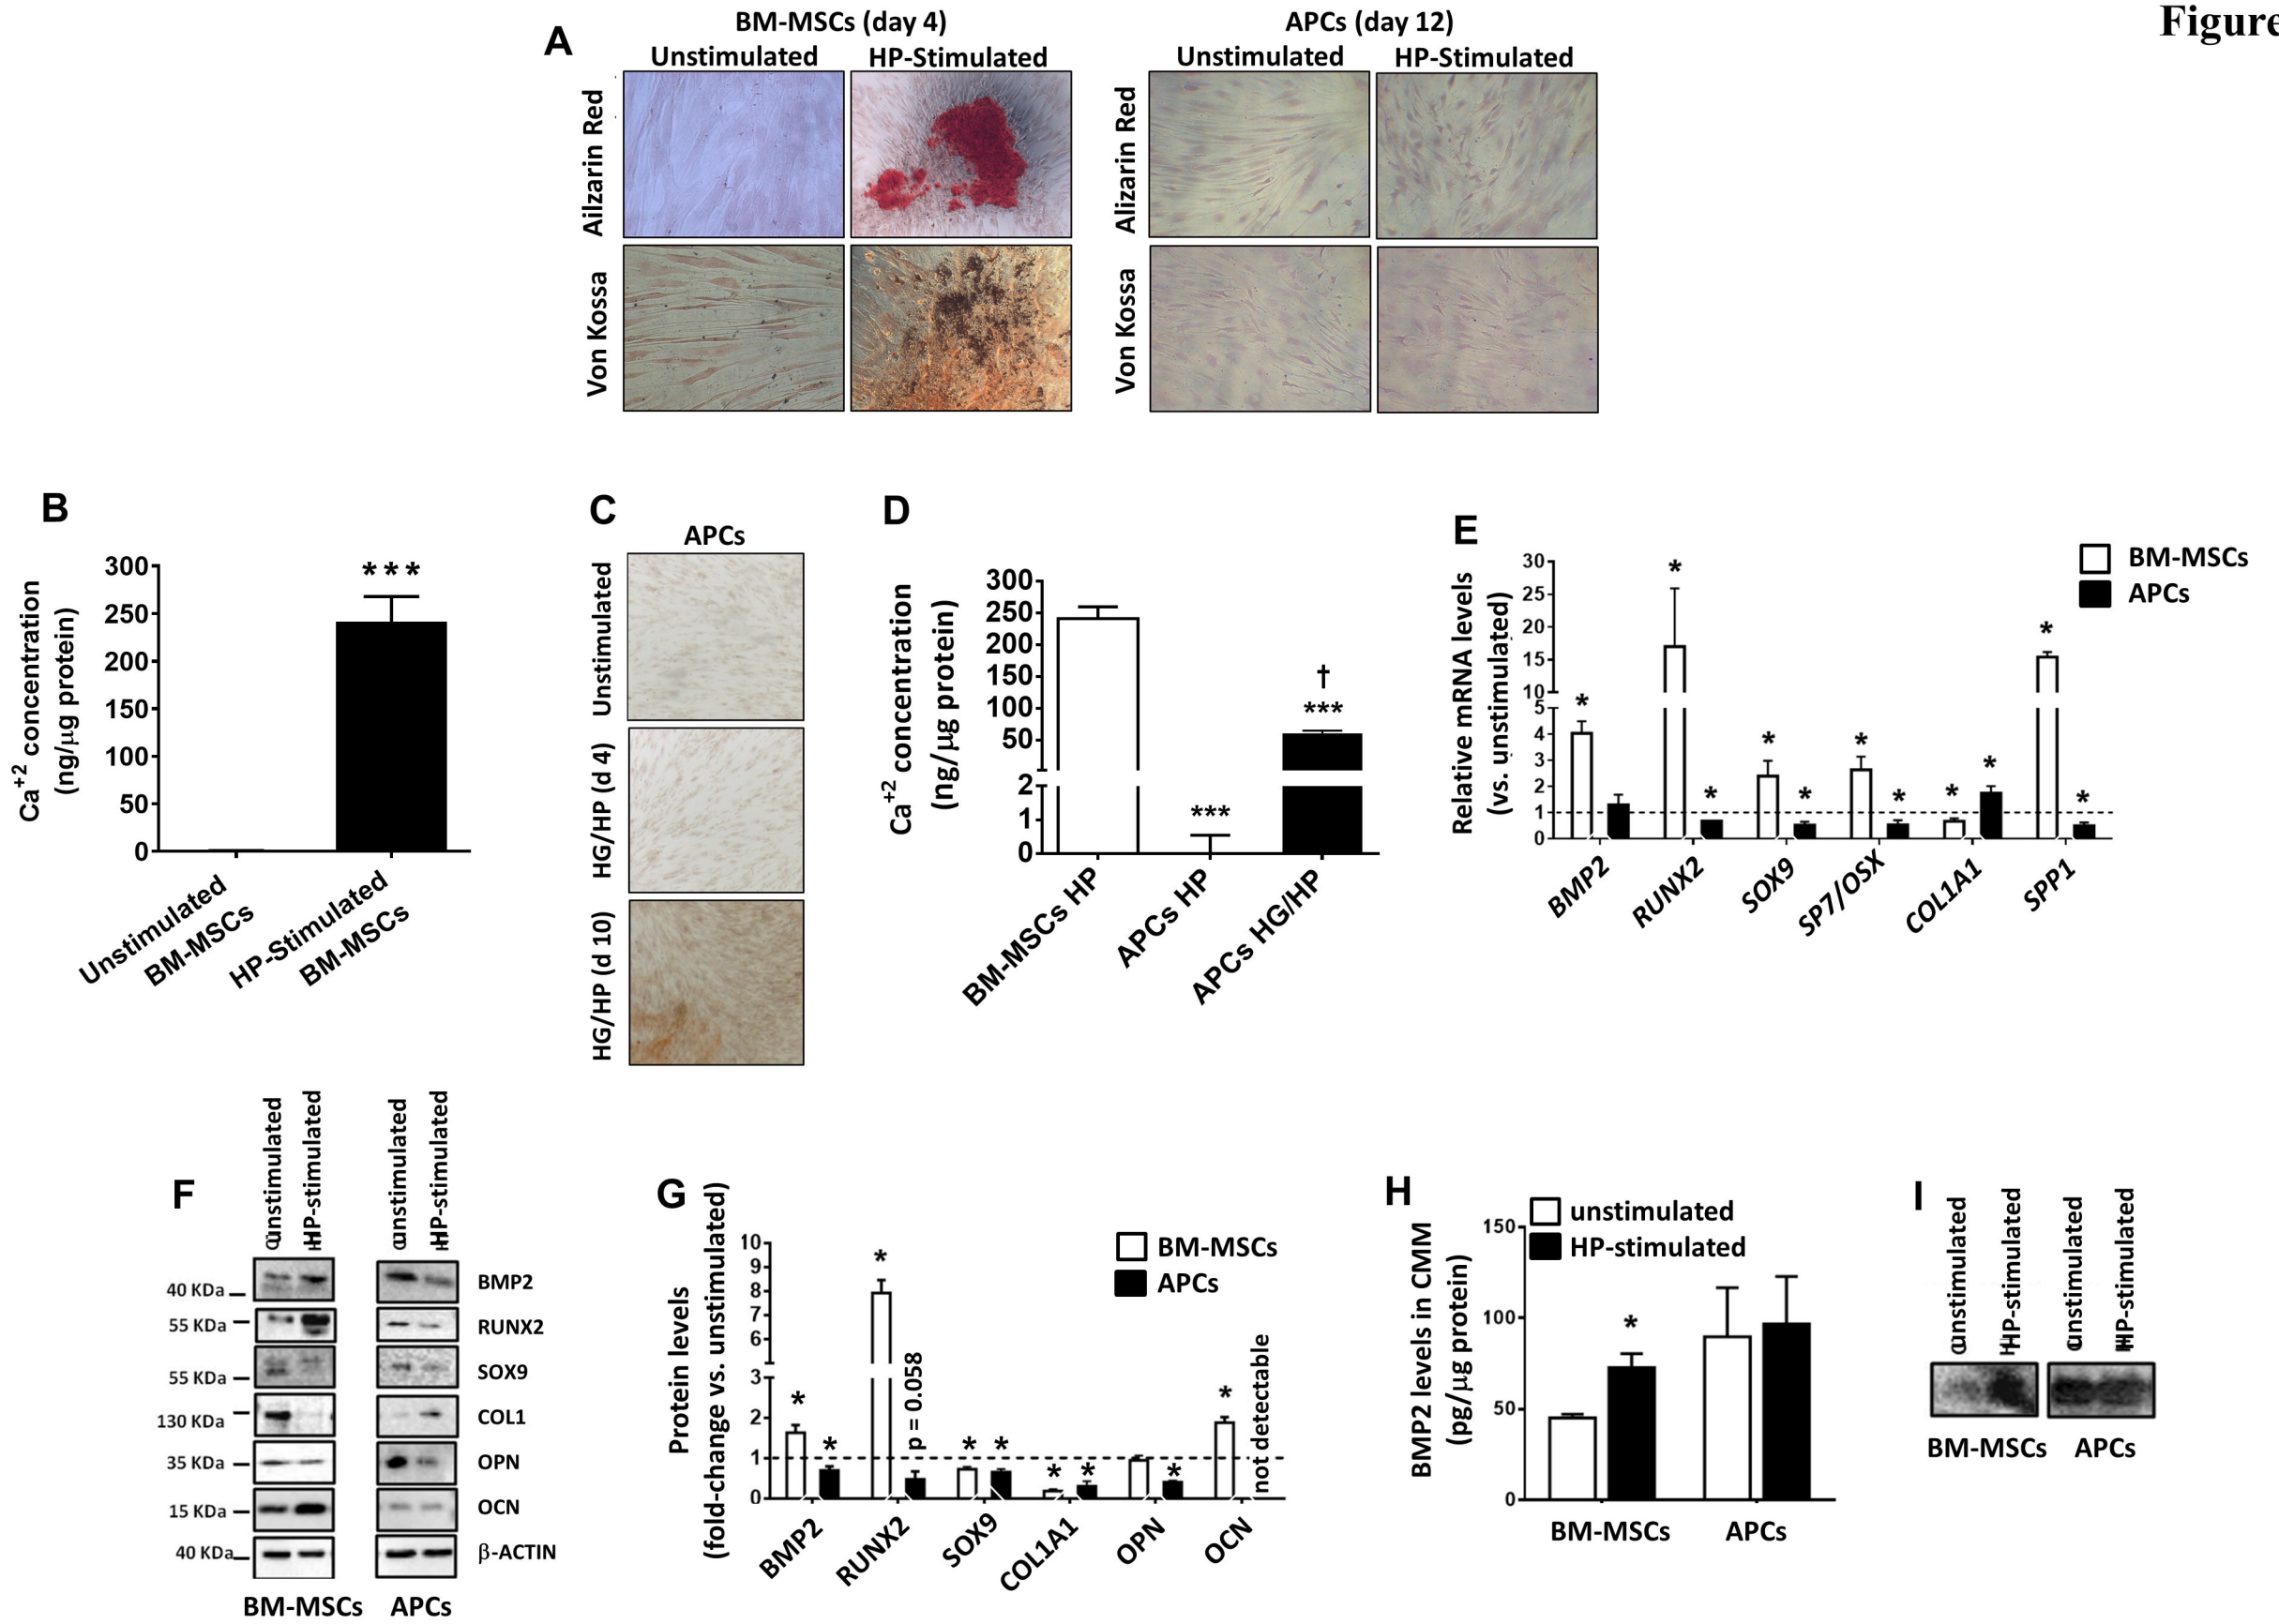

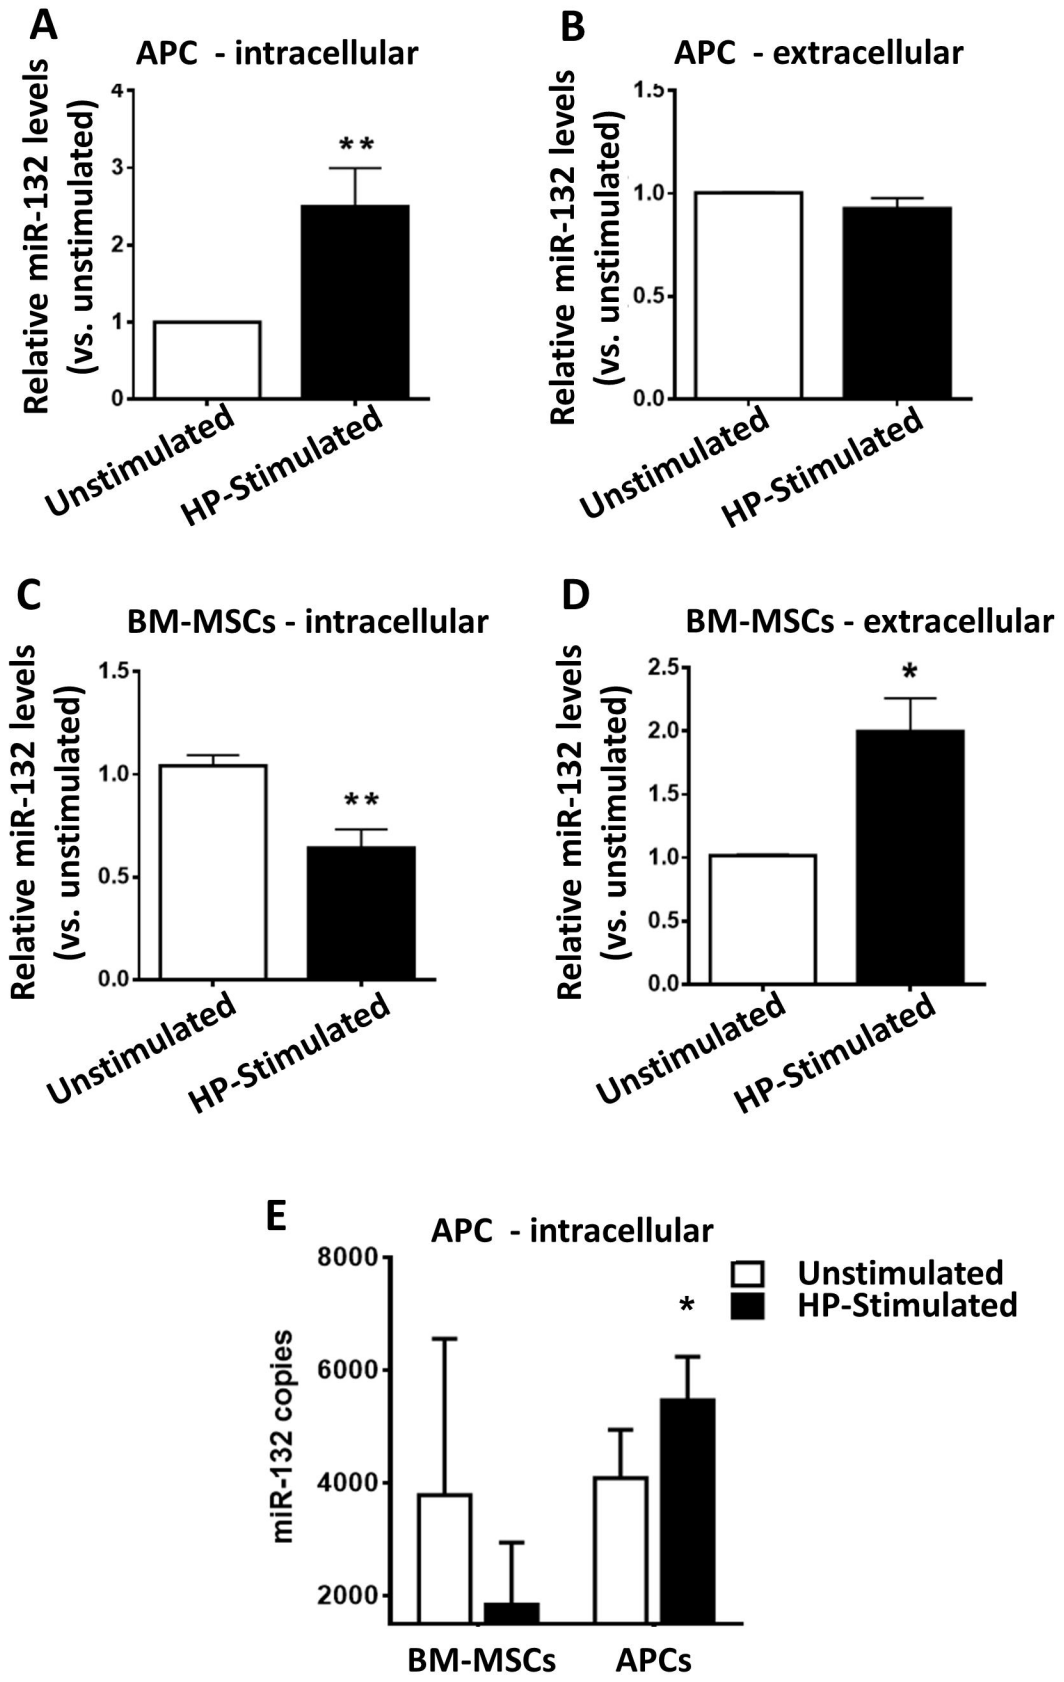

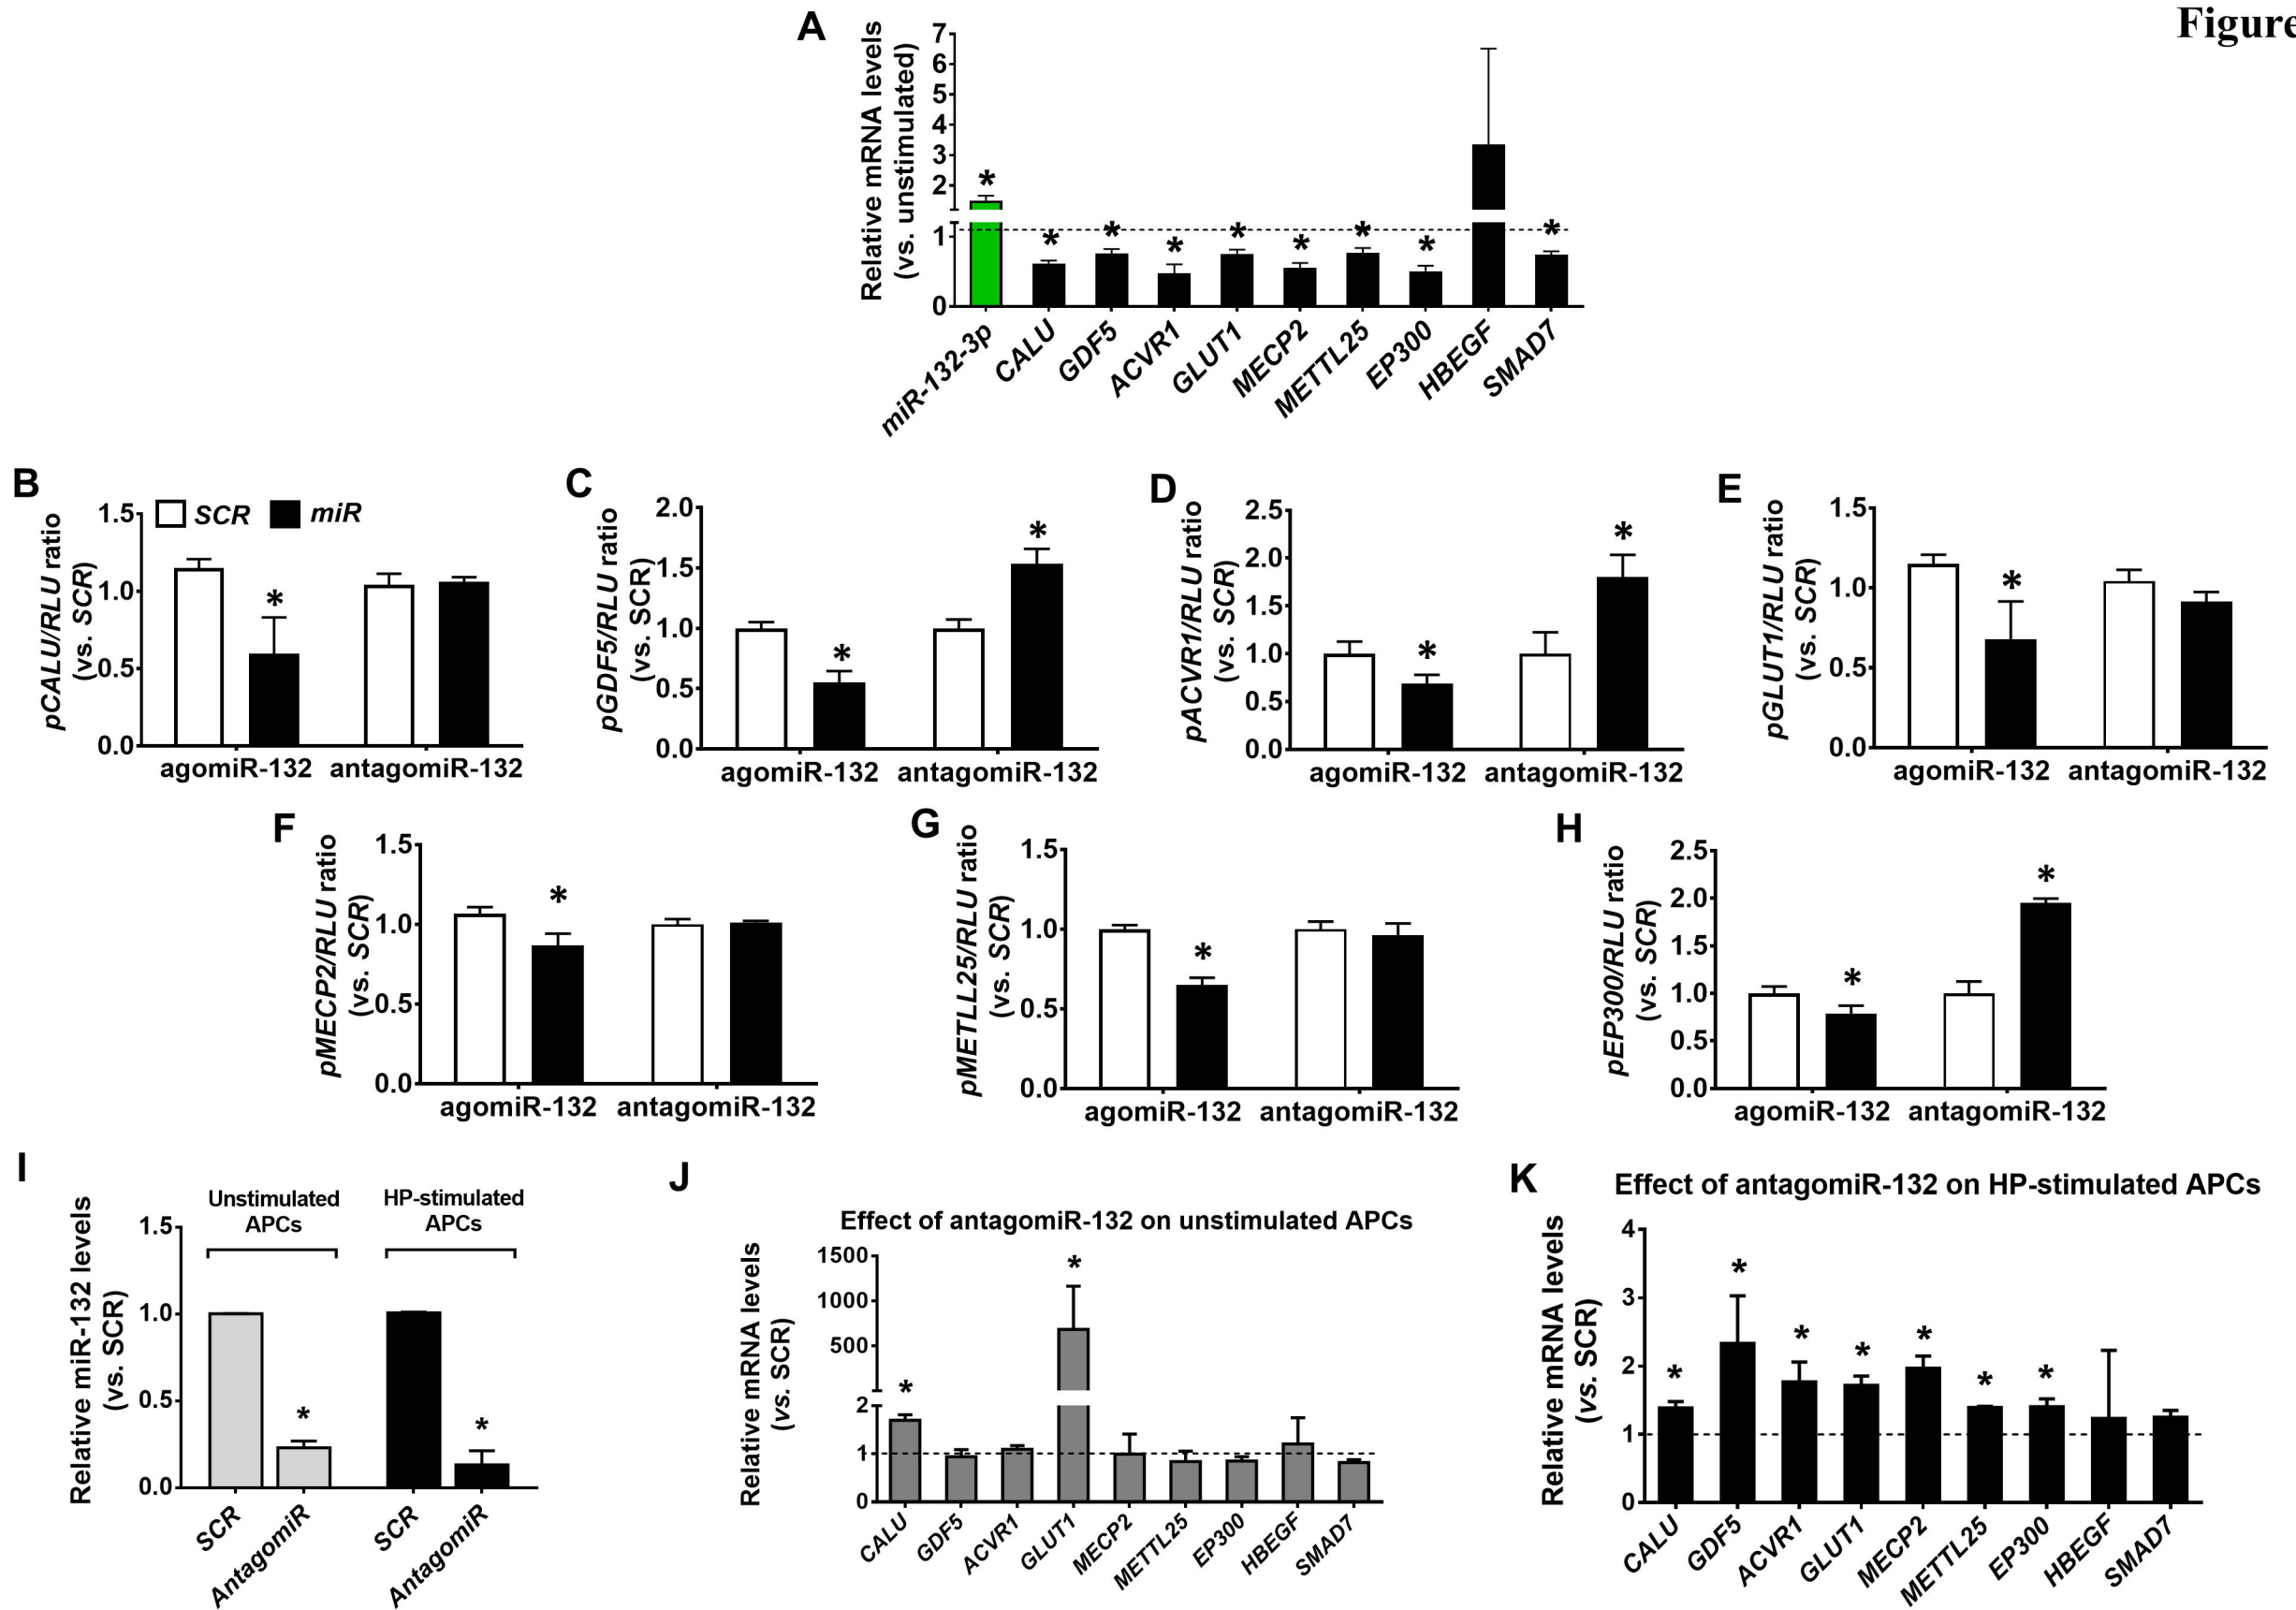

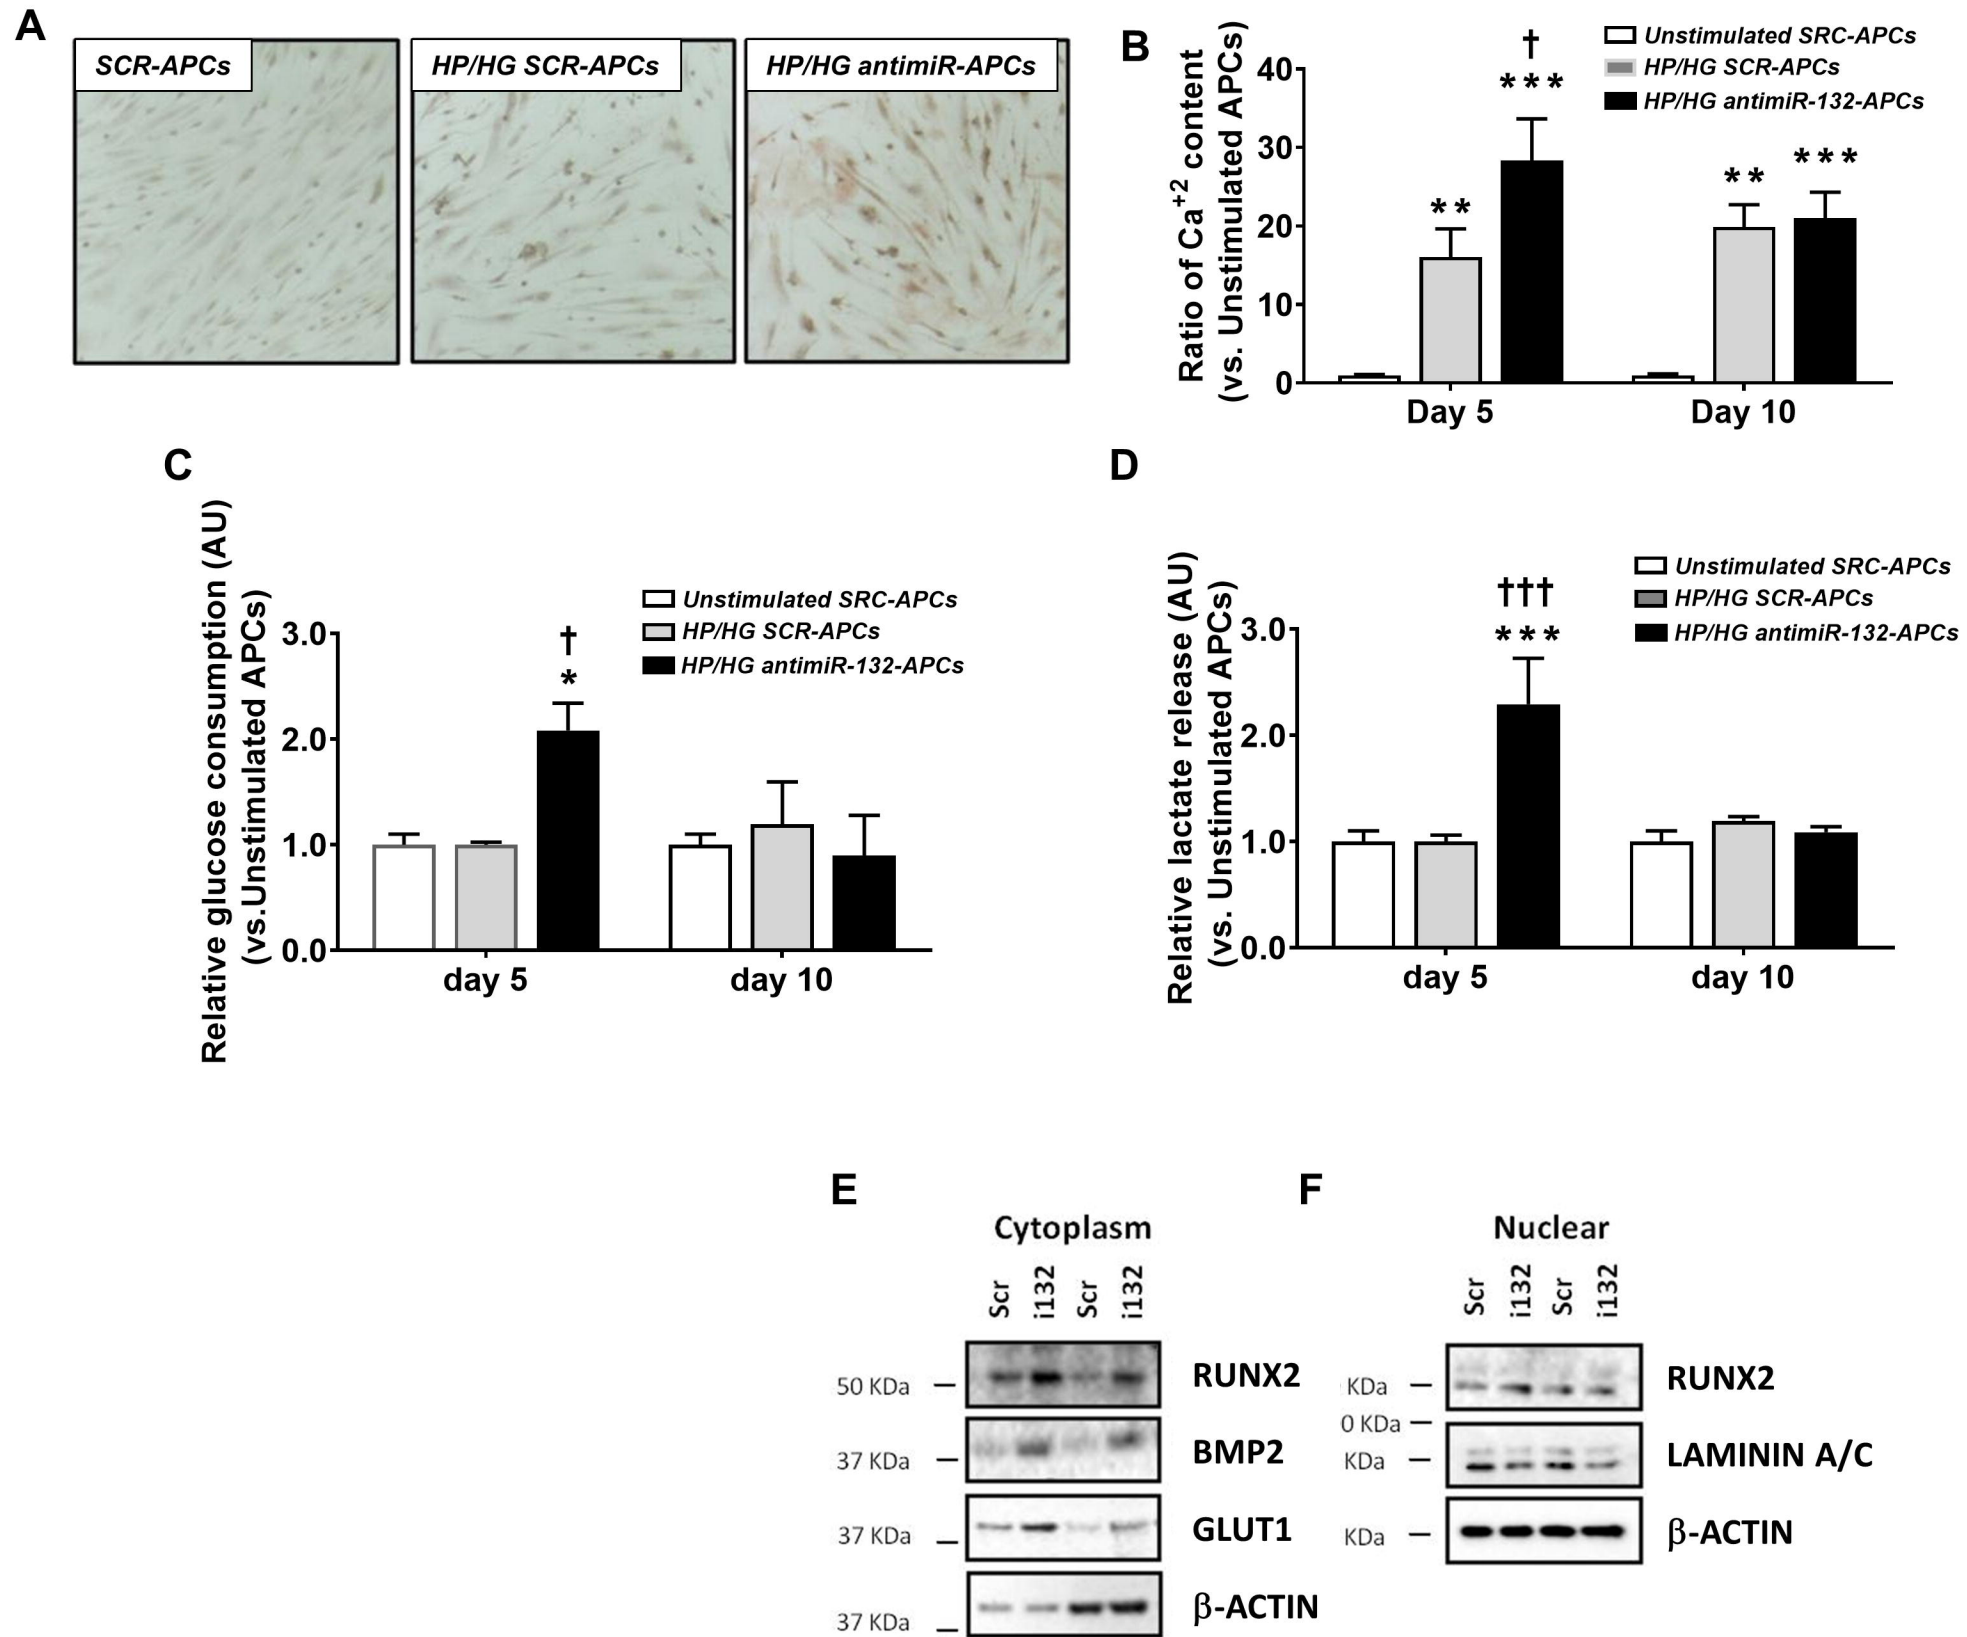

### A Effect of APC secretome on swine EAV

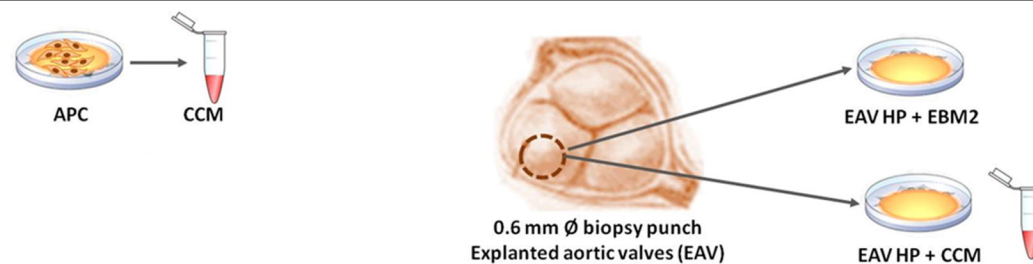

### Effect of miR-132 deplete APC secretome on swine EAV

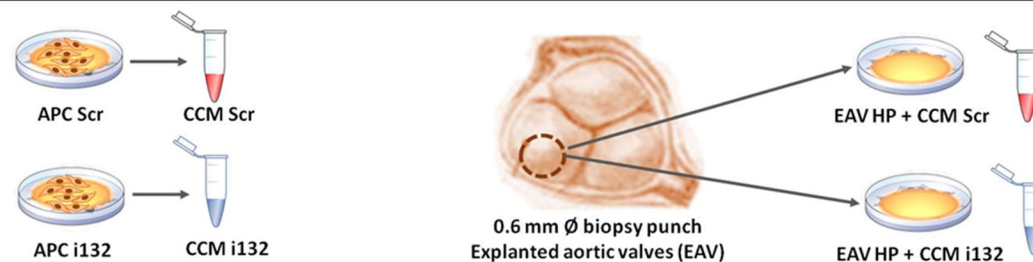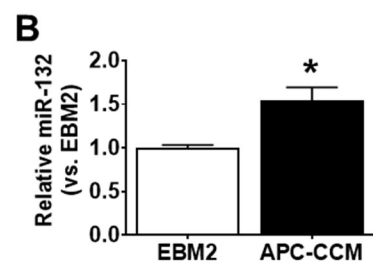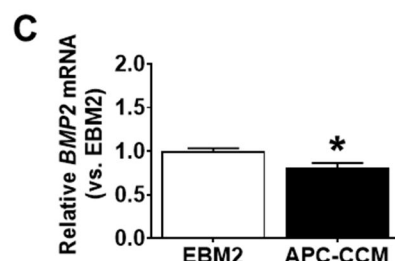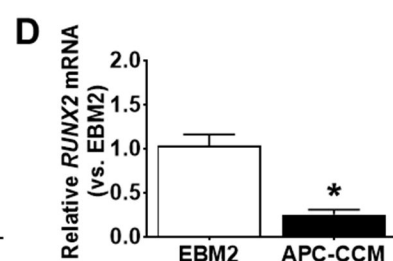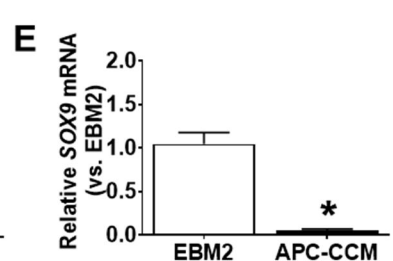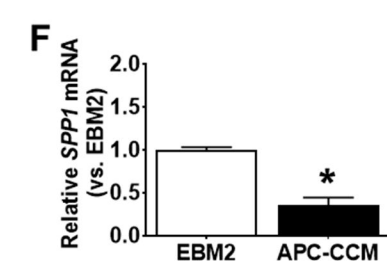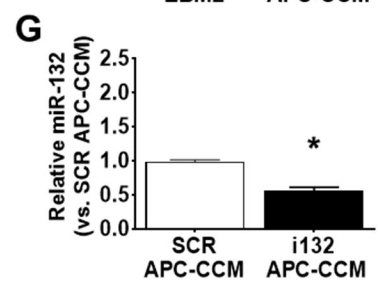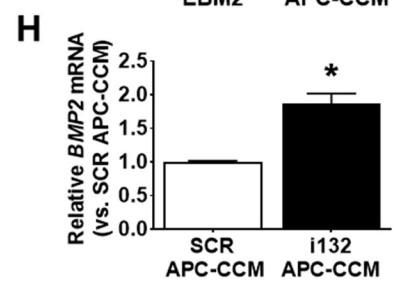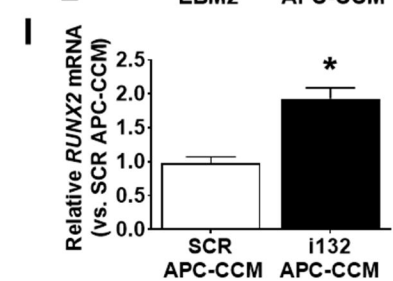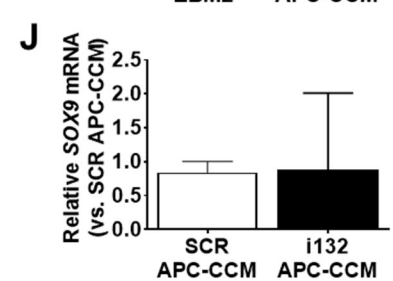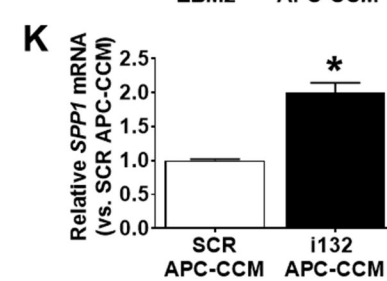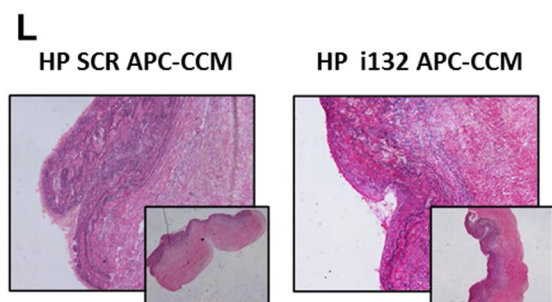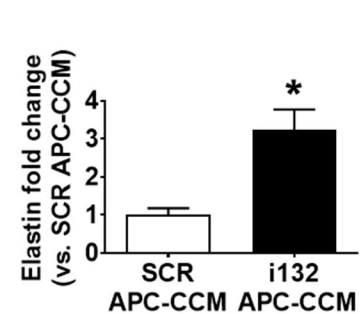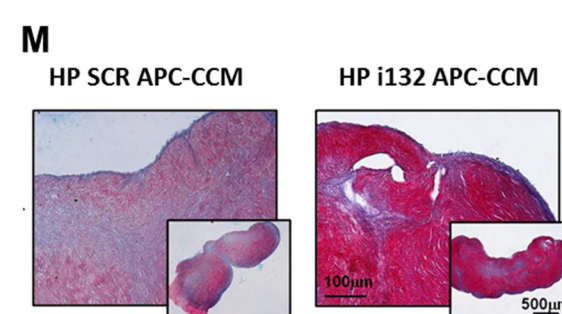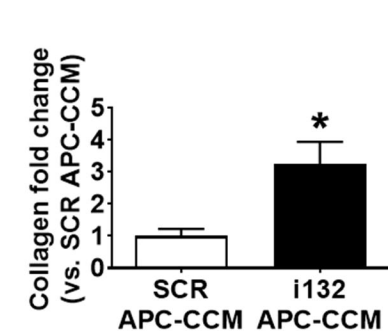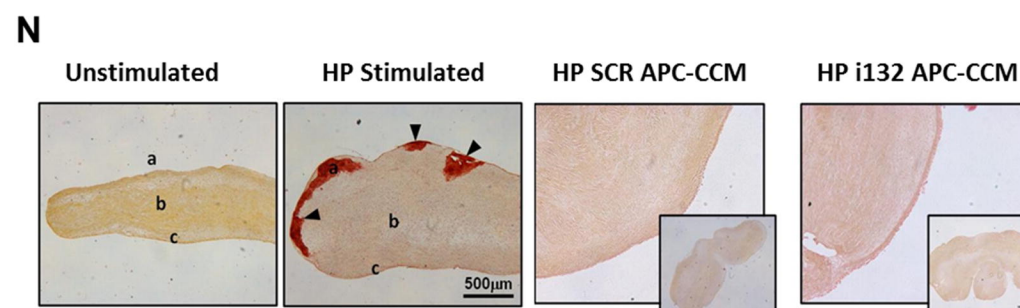

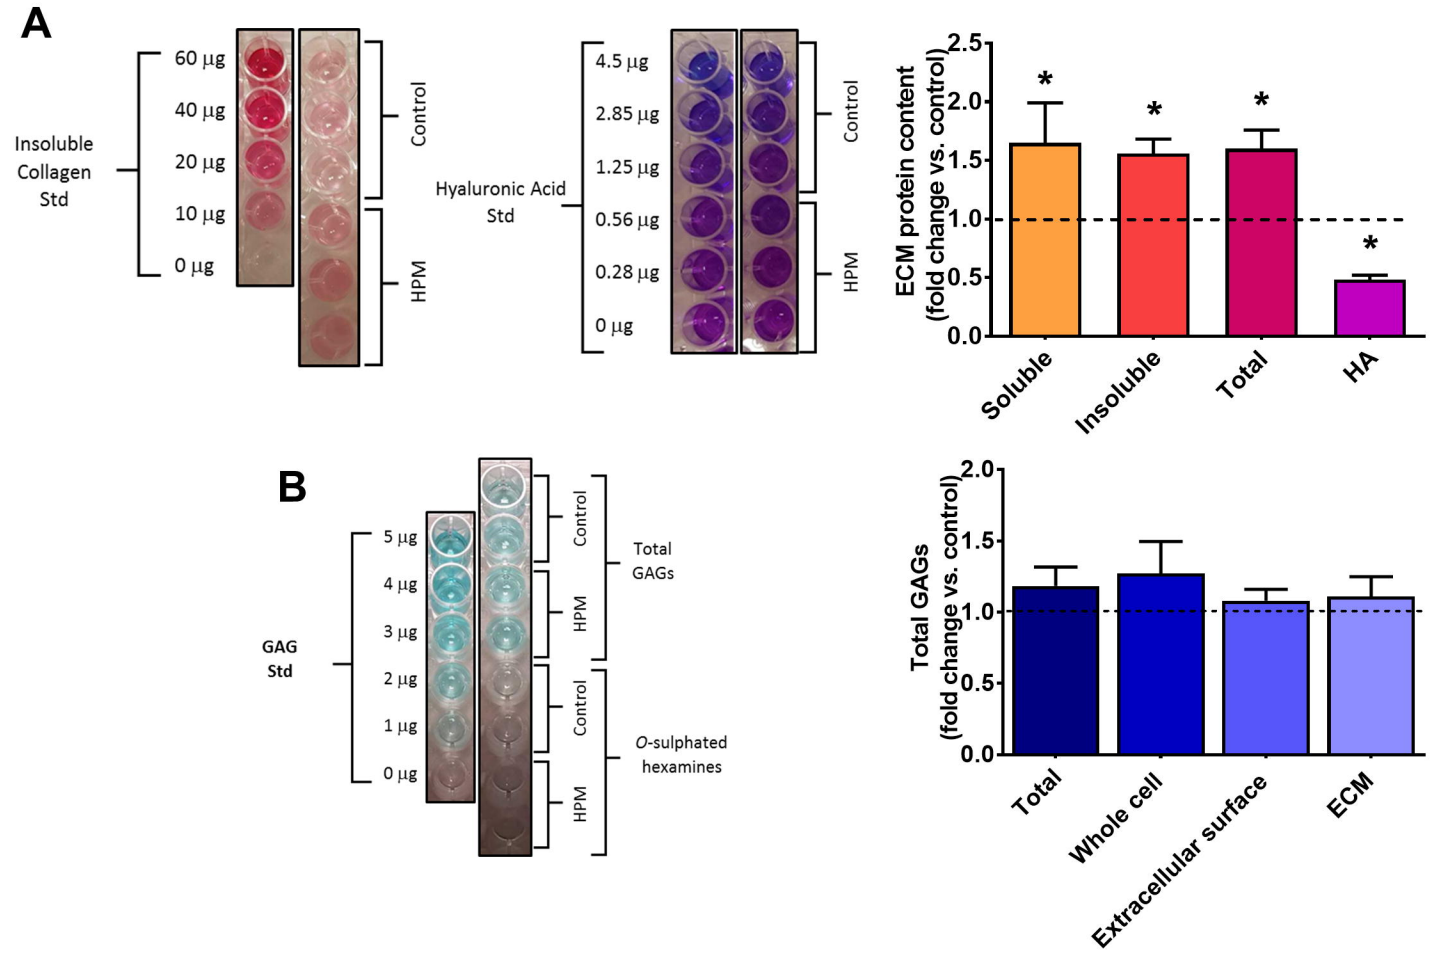



Figure 7

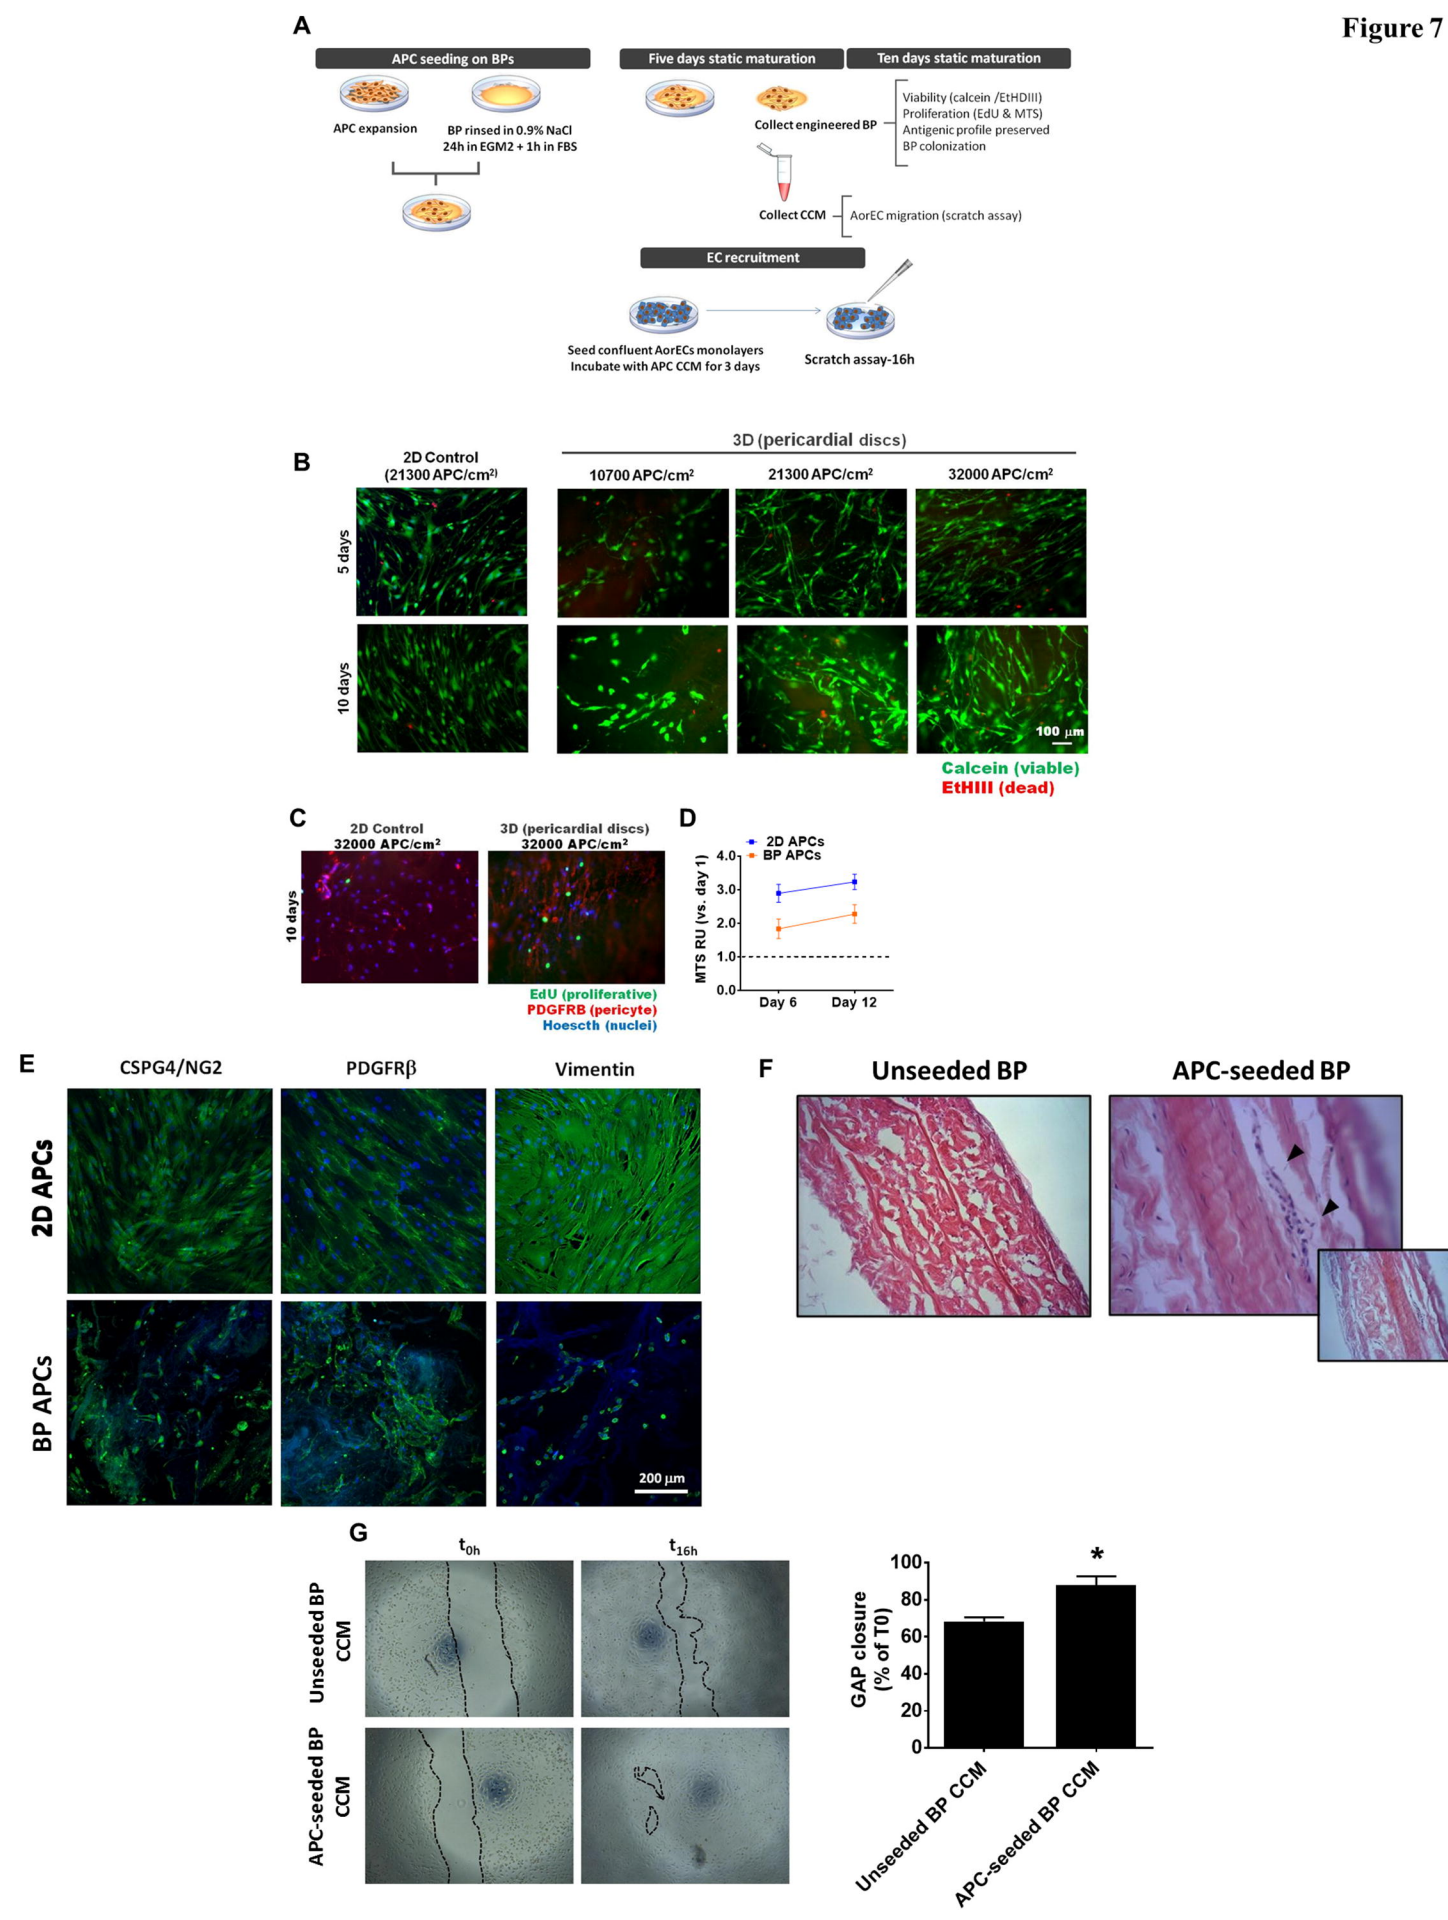

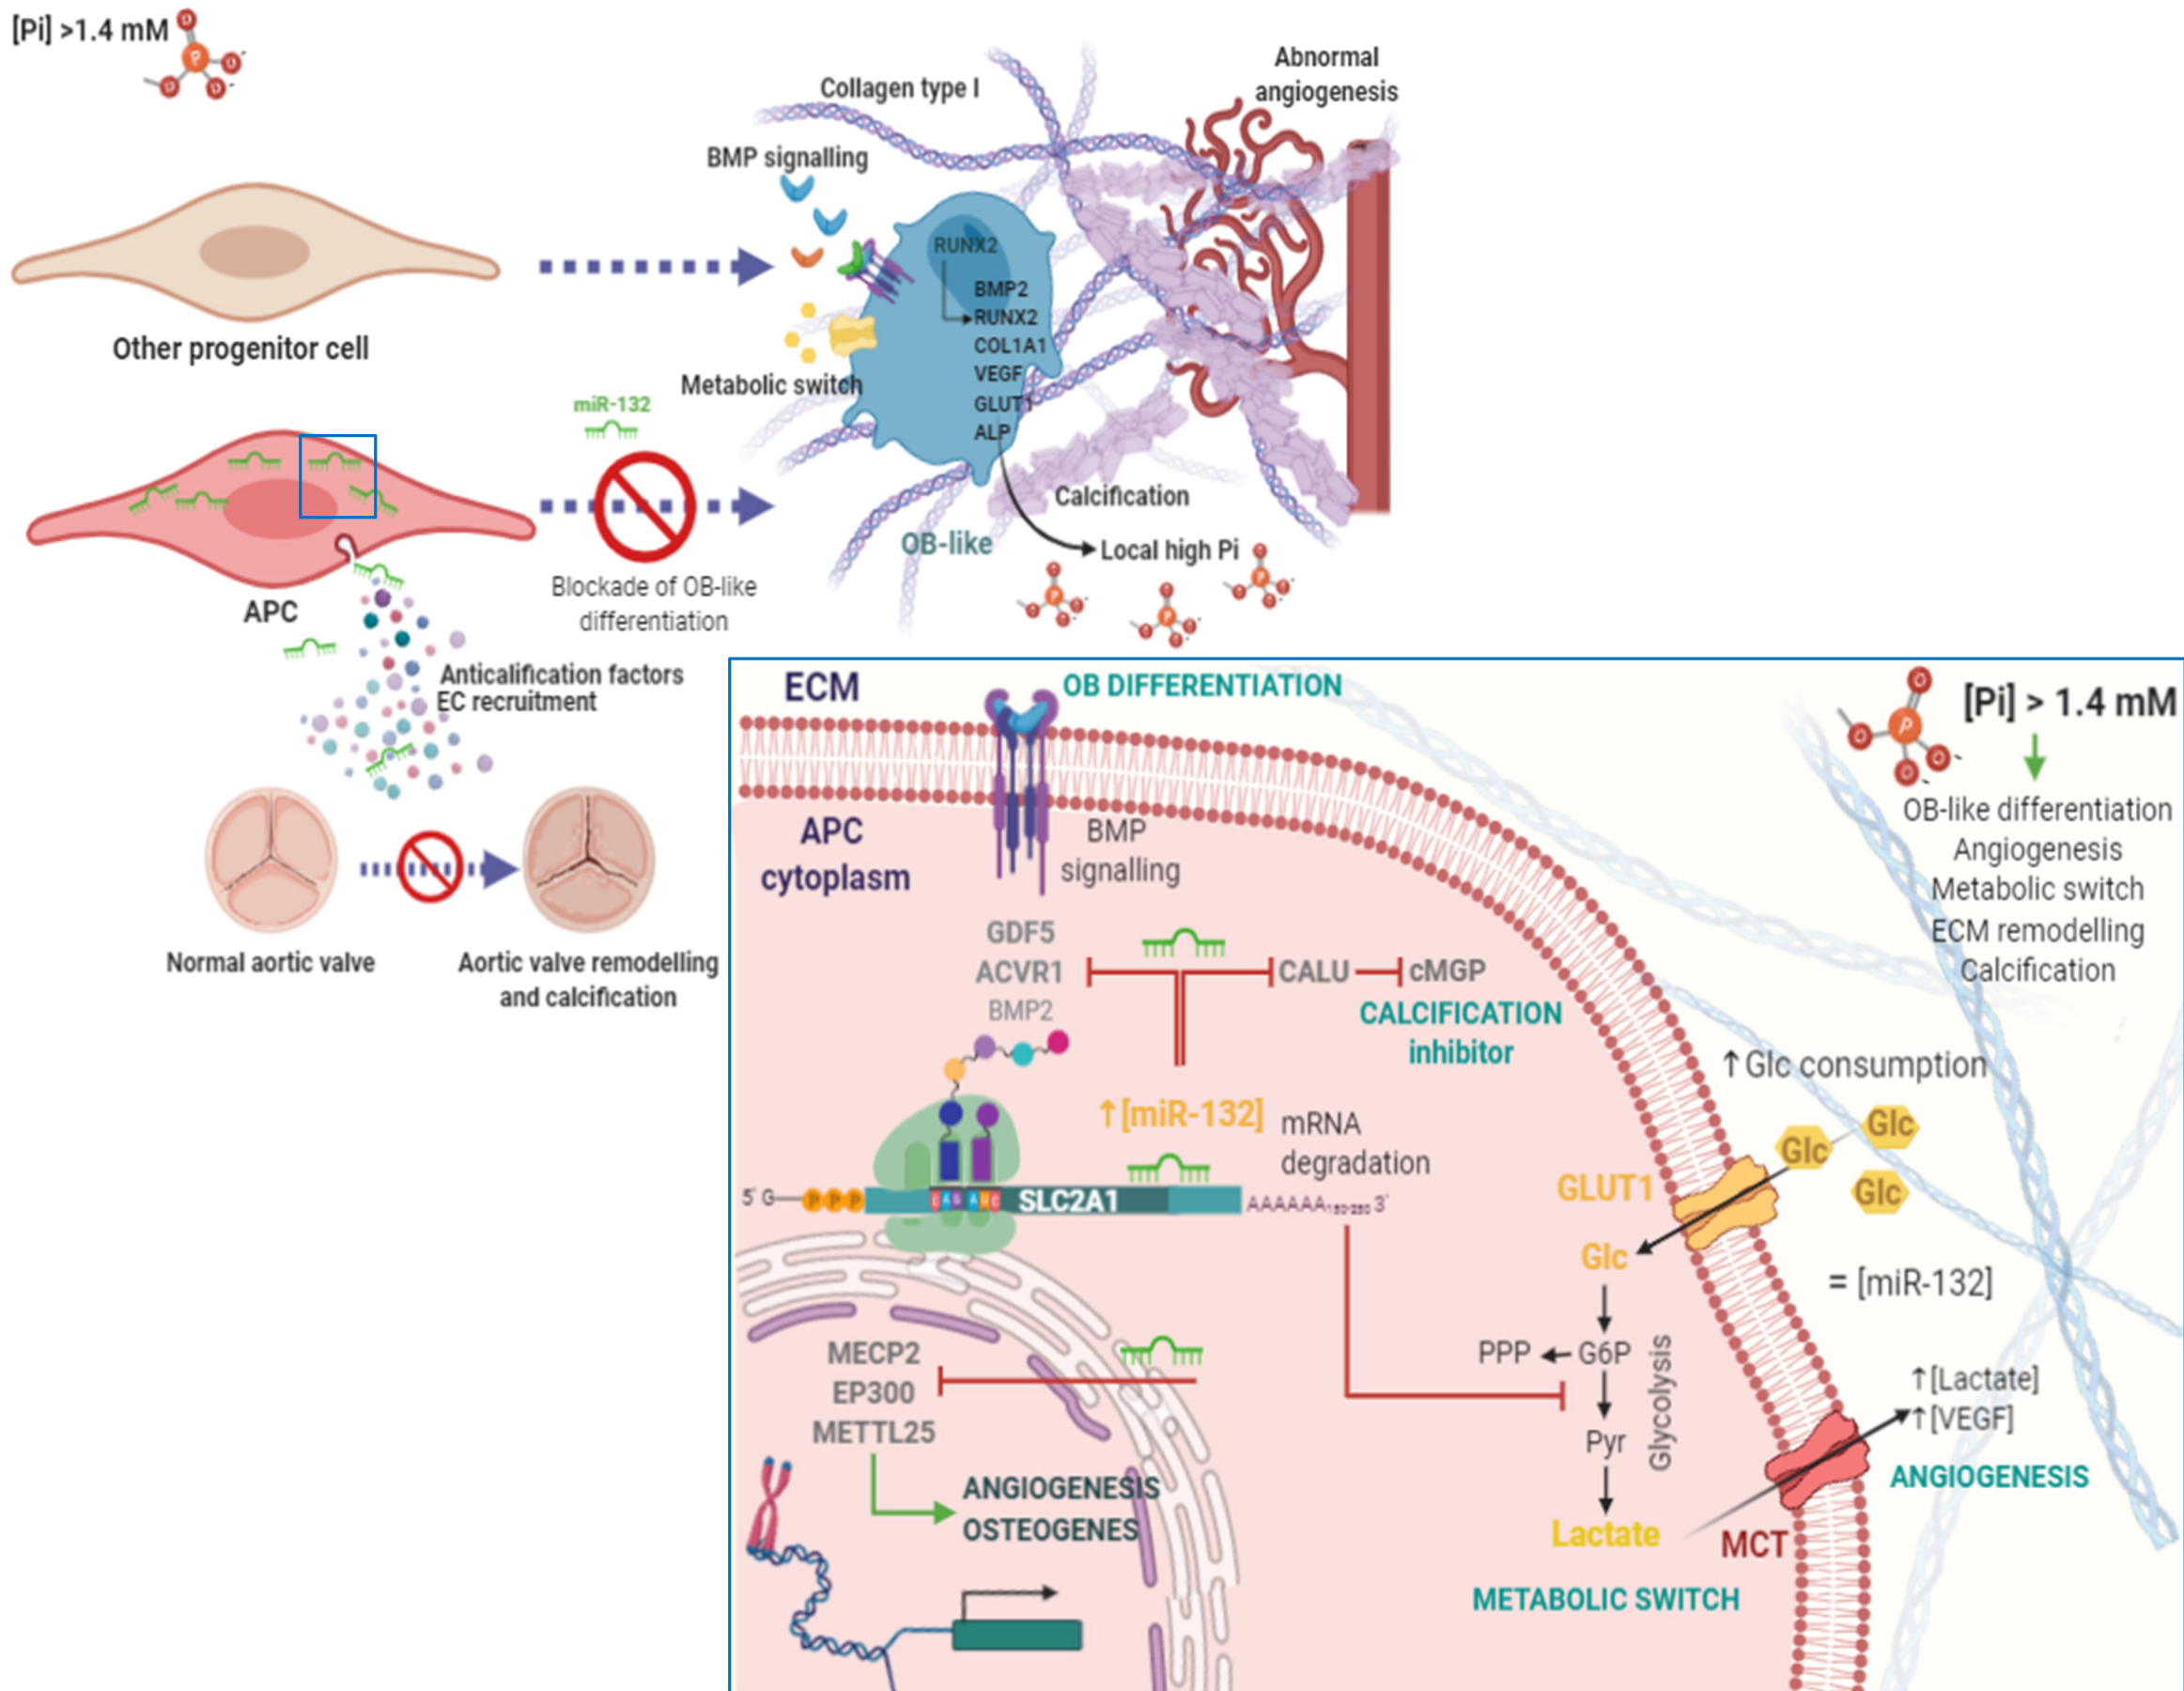

Source: https://www.biorxiv.org/content/10.1101/2020.07.14.202846v1.full.pdf
